# Supplementary material for: Spin transitions in ferric catecholate complexes mediated by outer-sphere counteranions
Source: Royal Society of Chemistry journal article supplement (doi:10.1039/d2dt01207c), 2022-01-01
Supplement: d2dt01207c1.pdf [file d2dt01207c1.pdf]

## **Electronic supporting information**

### **Spin transitions in ferric catecholate complexes mediated by outer-sphere counteranion**

M. Chegerev<sup>\*</sup>, O. Demidov, P. Vasiliev, N. Efimov, S. Kubrin, A. Starikov, V.  
Vlasenko, A. Piskunov, S. Shapovalova, A. Guda, Yu. Rusalev and A. Soldatov

**Table S1.** Crystallographic data for **1**, **3** and **4**.

| Parameter                                   | <b>1</b>                                                                         |                                                                                  | <b>3</b>                                                            |                                                                     | <b>4</b>                                                                          |                                                                                       |
|---------------------------------------------|----------------------------------------------------------------------------------|----------------------------------------------------------------------------------|---------------------------------------------------------------------|---------------------------------------------------------------------|-----------------------------------------------------------------------------------|---------------------------------------------------------------------------------------|
| Temperature/K                               | 100.01(15)                                                                       | 293(2)                                                                           | 100.01(11)                                                          | 293(2)                                                              | 100.02(11)                                                                        | 293(2)                                                                                |
| CCDC Number                                 | 2164135                                                                          | 2164133                                                                          | 2164128                                                             | 2164127                                                             | 2164130                                                                           | 2164132                                                                               |
| Empirical formula                           | C <sub>32</sub> H <sub>38</sub> F <sub>6</sub> FeN <sub>4</sub> O <sub>2</sub> P | C <sub>32</sub> H <sub>38</sub> F <sub>6</sub> FeN <sub>4</sub> O <sub>2</sub> P | C <sub>32</sub> H <sub>39</sub> ClFeN <sub>4</sub> O <sub>6.5</sub> | C <sub>32</sub> H <sub>39</sub> ClFeN <sub>4</sub> O <sub>6.5</sub> | C <sub>32</sub> H <sub>39</sub> BF <sub>4</sub> FeN <sub>4</sub> O <sub>2.5</sub> | C <sub>32</sub> H <sub>38.66</sub> BF <sub>4</sub> FeN <sub>4</sub> O <sub>2.33</sub> |
| Formula weight                              | 711.60                                                                           | 711.48                                                                           | 674.97                                                              | 674.97                                                              | 662.33                                                                            | 659.27                                                                                |
| Crystal system                              | orthorhombic                                                                     | orthorhombic                                                                     | triclinic                                                           | triclinic                                                           | triclinic                                                                         | triclinic                                                                             |
| Space group                                 | Pbcn                                                                             | Pbcn                                                                             | P-1                                                                 | P-1                                                                 | P-1                                                                               | P-1                                                                                   |
| a/Å                                         | 23.8272(3)                                                                       | 24.0039(3)                                                                       | 8.3709(2)                                                           | 8.5899(3)                                                           | 8.3740(3)                                                                         | 8.5955(5)                                                                             |
| b/Å                                         | 18.6423(2)                                                                       | 18.8295(2)                                                                       | 10.3122(2)                                                          | 10.3201(3)                                                          | 10.2623(3)                                                                        | 10.2994(4)                                                                            |
| c/Å                                         | 15.0968(2)                                                                       | 15.30660(10)                                                                     | 19.7722(3)                                                          | 20.3051(6)                                                          | 19.6717(6)                                                                        | 20.1677(8)                                                                            |
| α/°                                         | 90                                                                               | 90                                                                               | 97.511(2)                                                           | 94.917(2)                                                           | 97.060(2)                                                                         | 94.460(3)                                                                             |
| β/°                                         | 90                                                                               | 90                                                                               | 92.574(2)                                                           | 93.923(3)                                                           | 93.064(3)                                                                         | 94.614(4)                                                                             |
| γ/°                                         | 90                                                                               | 90                                                                               | 106.888(2)                                                          | 106.867(3)                                                          | 106.882(3)                                                                        | 106.445(4)                                                                            |
| Volume/Å <sup>3</sup>                       | 6705.91(14)                                                                      | 6918.30(12)                                                                      | 1612.97(6)                                                          | 1708.01(10)                                                         | 1598.31(9)                                                                        | 1697.36(14)                                                                           |
| Z                                           | 8                                                                                | 8                                                                                | 2                                                                   | 2                                                                   | 2                                                                                 | 2                                                                                     |
| ρ <sub>calc</sub> /cm <sup>3</sup>          | 1.410                                                                            | 1.366                                                                            | 1.390                                                               | 1.312                                                               | 1.376                                                                             | 1.290                                                                                 |
| μ/mm <sup>-1</sup>                          | 4.661                                                                            | 4.518                                                                            | 4.936                                                               | 4.662                                                               | 4.303                                                                             | 4.046                                                                                 |
| F(000)                                      | 2952.0                                                                           | 2952.0                                                                           | 708.0                                                               | 708.0                                                               | 692.0                                                                             | 689.0                                                                                 |
| Crystal size/mm <sup>3</sup>                | 0.362 × 0.086 × 0.067                                                            | 0.388 × 0.095 × 0.06                                                             | 0.35 × 0.232 × 0.21                                                 | 0.516 × 0.348 × 0.286                                               | 0.366 × 0.286 × 0.101                                                             | 0.438 × 0.343 × 0.158                                                                 |
| Radiation                                   | Cu Kα (λ = 1.54184)                                                              | Cu Kα (λ = 1.54184)                                                              | Cu Kα (λ = 1.54184)                                                 | Cu Kα (λ = 1.54184)                                                 | Cu Kα (λ = 1.54184)                                                               | Cu Kα (λ = 1.54184)                                                                   |
| 2θ range for data collection/°              | 6.02 to 152.824                                                                  | 5.966 to 153                                                                     | 4.526 to 152.892                                                    | 8.784 to 153.06                                                     | 9.1 to 152.902                                                                    | 4.42 to 152.704                                                                       |
| Index ranges                                | -28 ≤ h ≤ 29, -23 ≤ k ≤ 19, -18 ≤ l ≤ 18                                         | -30 ≤ h ≤ 27, -23 ≤ k ≤ 23, -15 ≤ l ≤ 19                                         | -10 ≤ h ≤ 10, -12 ≤ k ≤ 9, -24 ≤ l ≤ 24                             | -10 ≤ h ≤ 10, -13 ≤ k ≤ 12, -22 ≤ l ≤ 25                            | -10 ≤ h ≤ 10, -9 ≤ k ≤ 12, -24 ≤ l ≤ 24                                           | -10 ≤ h ≤ 10, -12 ≤ k ≤ 12, -24 ≤ l ≤ 25                                              |
| Reflections collected                       | 37644                                                                            | 104873                                                                           | 33846                                                               | 35491                                                               | 32634                                                                             | 27902                                                                                 |
| Independent reflections                     | 7007 [R <sub>int</sub> = 0.0274, R <sub>sigma</sub> = 0.0198]                    | 7262 [R <sub>int</sub> = 0.1058, R <sub>sigma</sub> = 0.0381]                    | 6759 [R <sub>int</sub> = 0.0289, R <sub>sigma</sub> = 0.0214]       | 7137 [R <sub>int</sub> = 0.0333, R <sub>sigma</sub> = 0.0233]       | 6673 [R <sub>int</sub> = 0.0550, R <sub>sigma</sub> = 0.0408]                     | 7070 [R <sub>int</sub> = 0.0548, R <sub>sigma</sub> = 0.0399]                         |
| Data/restraints/parameters                  | 7007/0/451                                                                       | 7262/0/442                                                                       | 6759/10/452                                                         | 7137/0/565                                                          | 6673/0/455                                                                        | 7070/40/483                                                                           |
| Goodness-of-fit on F <sup>2</sup>           | 1.023                                                                            | 1.056                                                                            | 1.039                                                               | 1.026                                                               | 1.042                                                                             | 1.019                                                                                 |
| Final R indexes [I > 2σ (I)]                | R <sub>1</sub> = 0.0339, wR <sub>2</sub> = 0.0842                                | R <sub>1</sub> = 0.0467, wR <sub>2</sub> = 0.1256                                | R <sub>1</sub> = 0.0355, wR <sub>2</sub> = 0.0925                   | R <sub>1</sub> = 0.0418, wR <sub>2</sub> = 0.1149                   | R <sub>1</sub> = 0.0519, wR <sub>2</sub> = 0.1264                                 | R <sub>1</sub> = 0.0589, wR <sub>2</sub> = 0.1612                                     |
| Final R indexes [all data]                  | R <sub>1</sub> = 0.0380, wR <sub>2</sub> = 0.0877                                | R <sub>1</sub> = 0.0537, wR <sub>2</sub> = 0.1332                                | R <sub>1</sub> = 0.0369, wR <sub>2</sub> = 0.0941                   | R <sub>1</sub> = 0.0468, wR <sub>2</sub> = 0.1220                   | R <sub>1</sub> = 0.0576, wR <sub>2</sub> = 0.1317                                 | R <sub>1</sub> = 0.0799, wR <sub>2</sub> = 0.1818                                     |
| Largest diff. peak/hole / e Å <sup>-3</sup> | 0.62/-0.65                                                                       | 0.52/-0.50                                                                       | 0.31/-0.66                                                          | 0.22/-0.27                                                          | 0.53/-0.45                                                                        | 0.32/-0.42                                                                            |

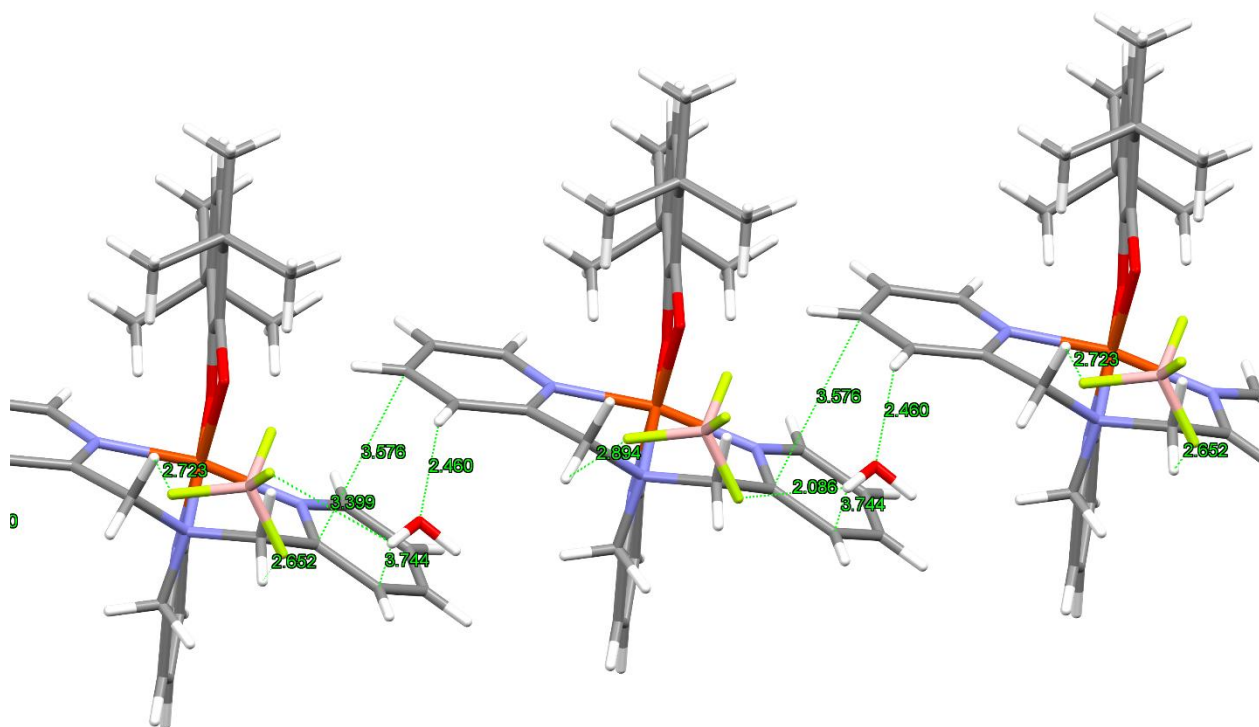

**Fig. S1** Fragment of crystal packing and intermolecular interactions of complex **4**.

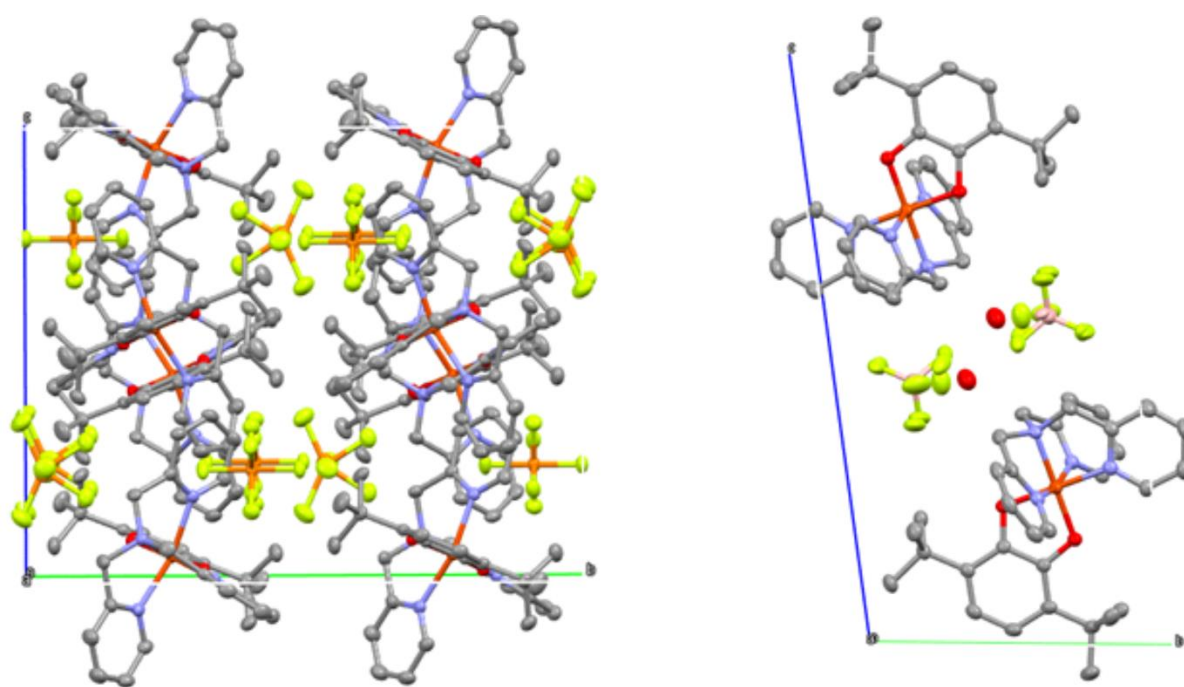

**Fig. S2** Packing diagrams of **1** (left) and **4** (right) at 100 K in the *bc* plane (view along the *a* axis). Hydrogen atoms are omitted for clarity.

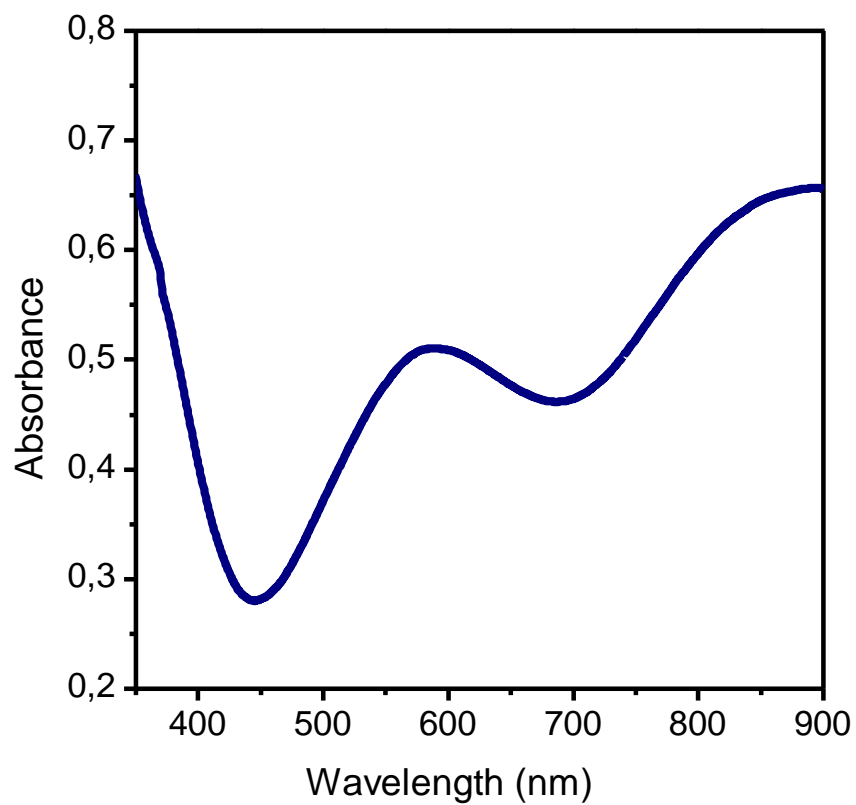

**Fig. S3** UV-Vis spectrum of **4** in acetone at 298K ( $C = 3 \cdot 10^{-4}$  M).

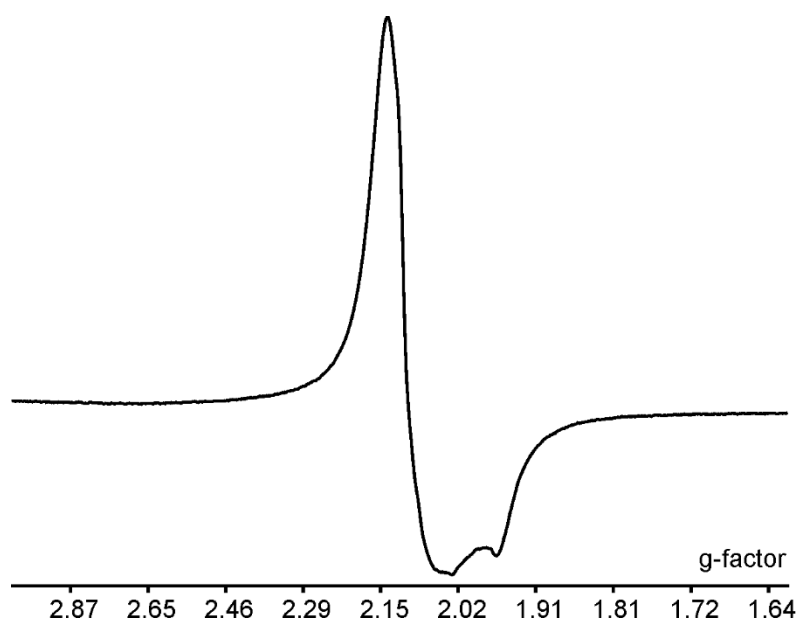

**Fig. S4** X-Band EPR spectrum of low-spin isomer of **3** in frozen  $\text{CH}_2\text{Cl}_2$  solution at 150 K.

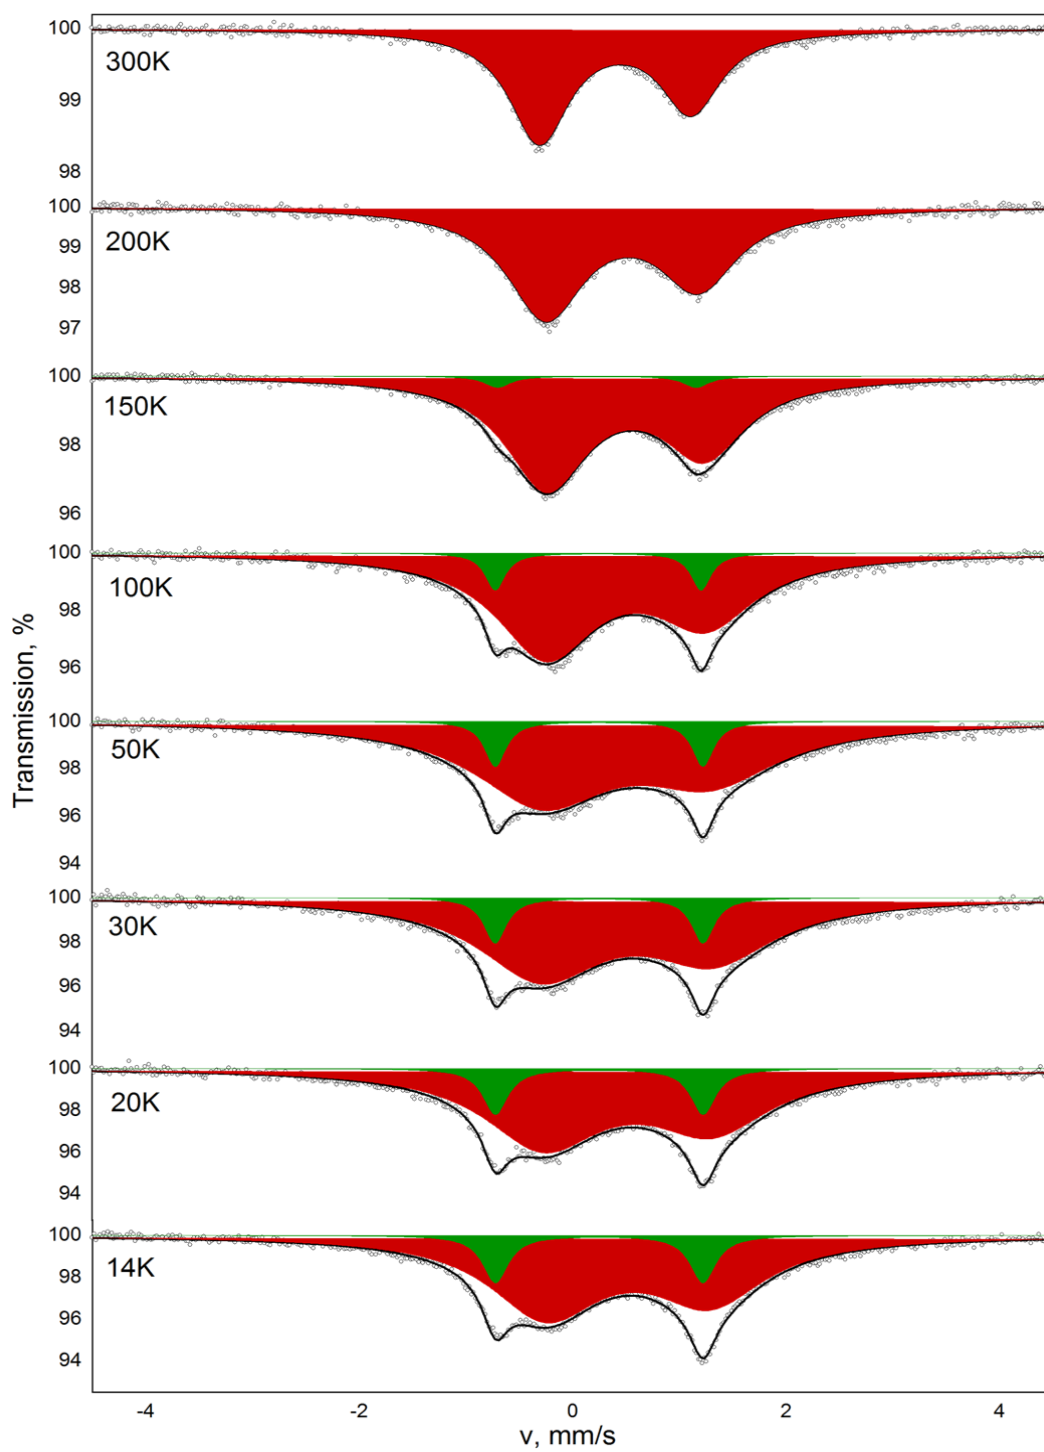

**Fig. S5** Variable temperature  $^{57}\text{Fe}$  Mössbauer spectra of **1** (hs- $\text{Fe}^{\text{III}}$  – red, ls- $\text{Fe}^{\text{III}}$  - green).

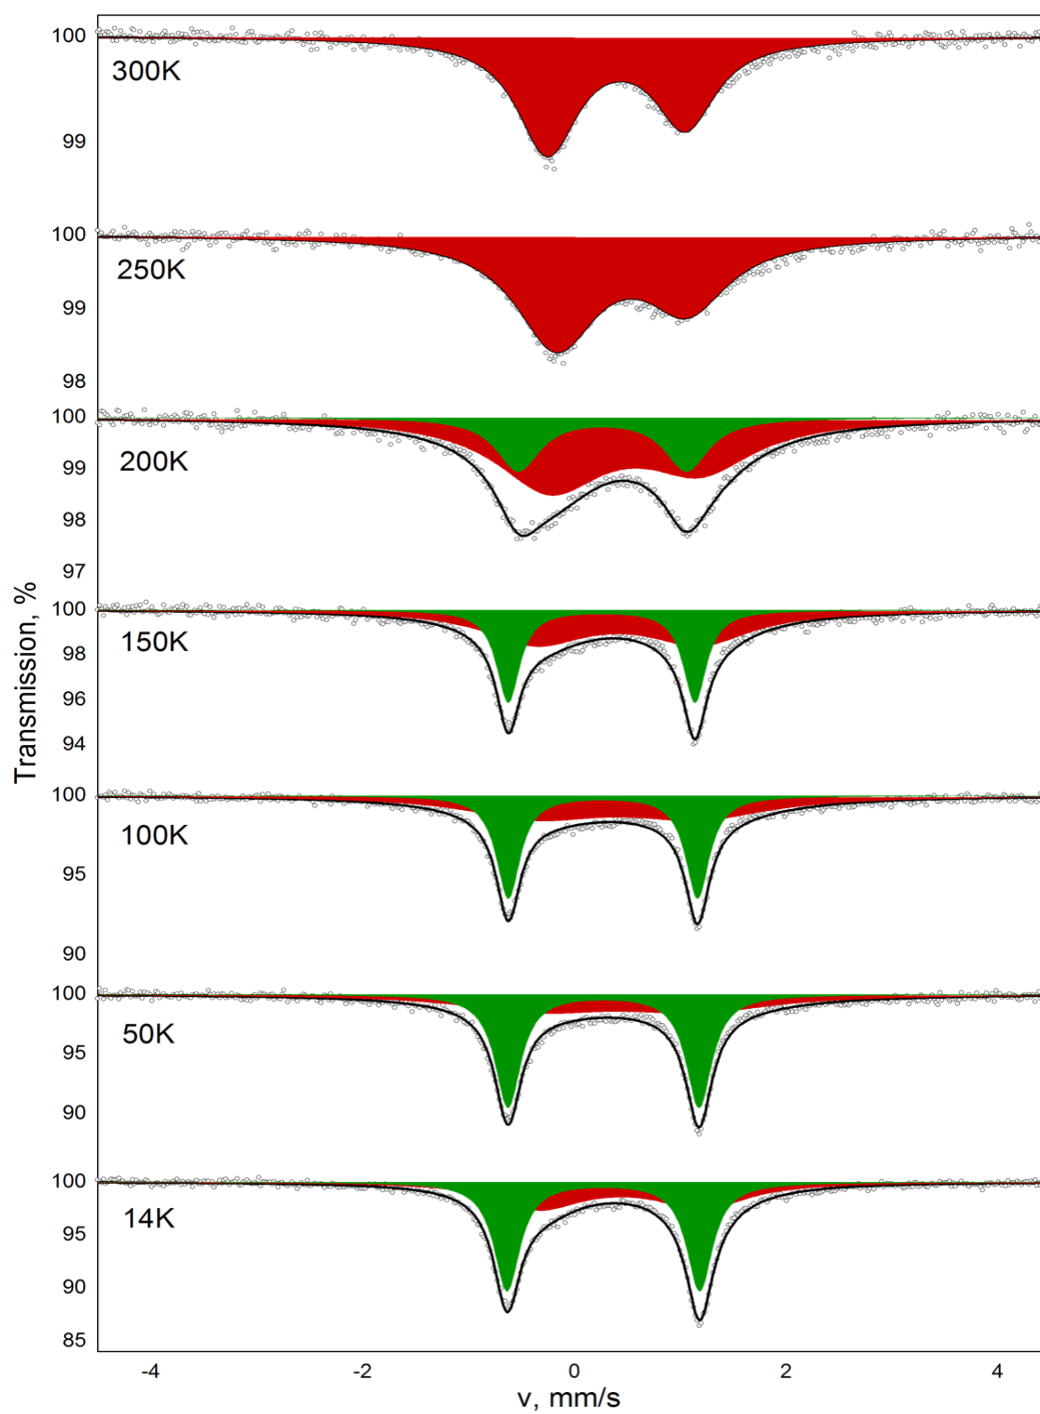

**Fig. S6** Variable temperature  $^{57}\text{Fe}$  Mössbauer spectra of **2** (hs- $\text{Fe}^{\text{III}}$  – red, ls- $\text{Fe}^{\text{III}}$  - green).

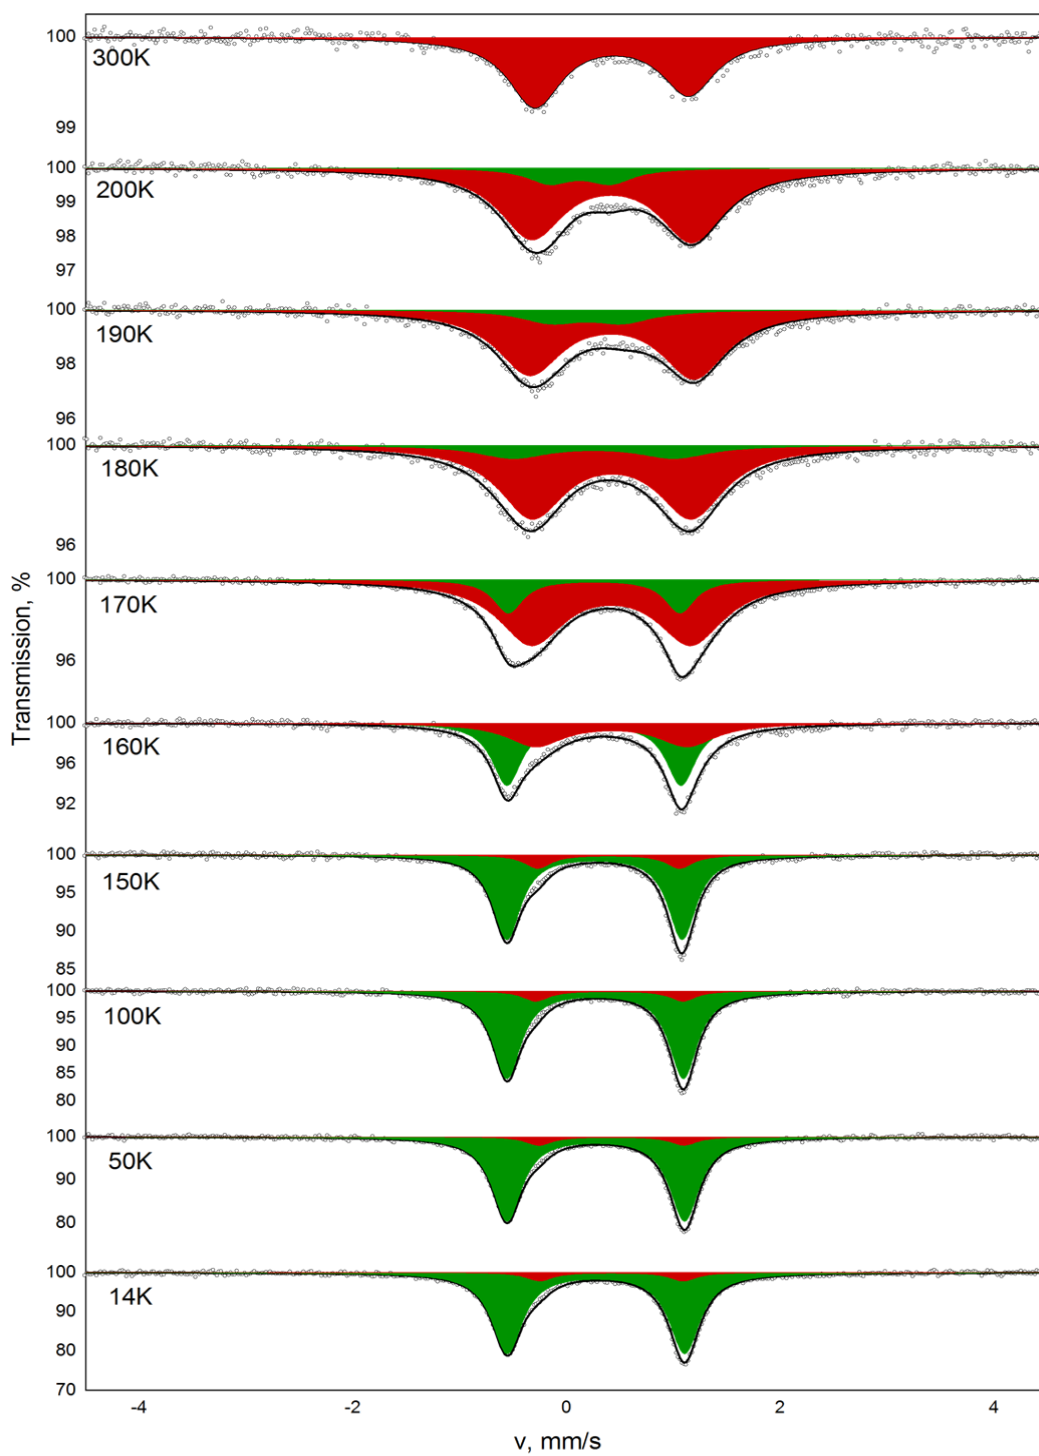

**Fig. S7** Variable temperature  $^{57}\text{Fe}$  Mössbauer spectra of **3** (hs-Fe<sup>III</sup> – red, ls-Fe<sup>III</sup> - green).

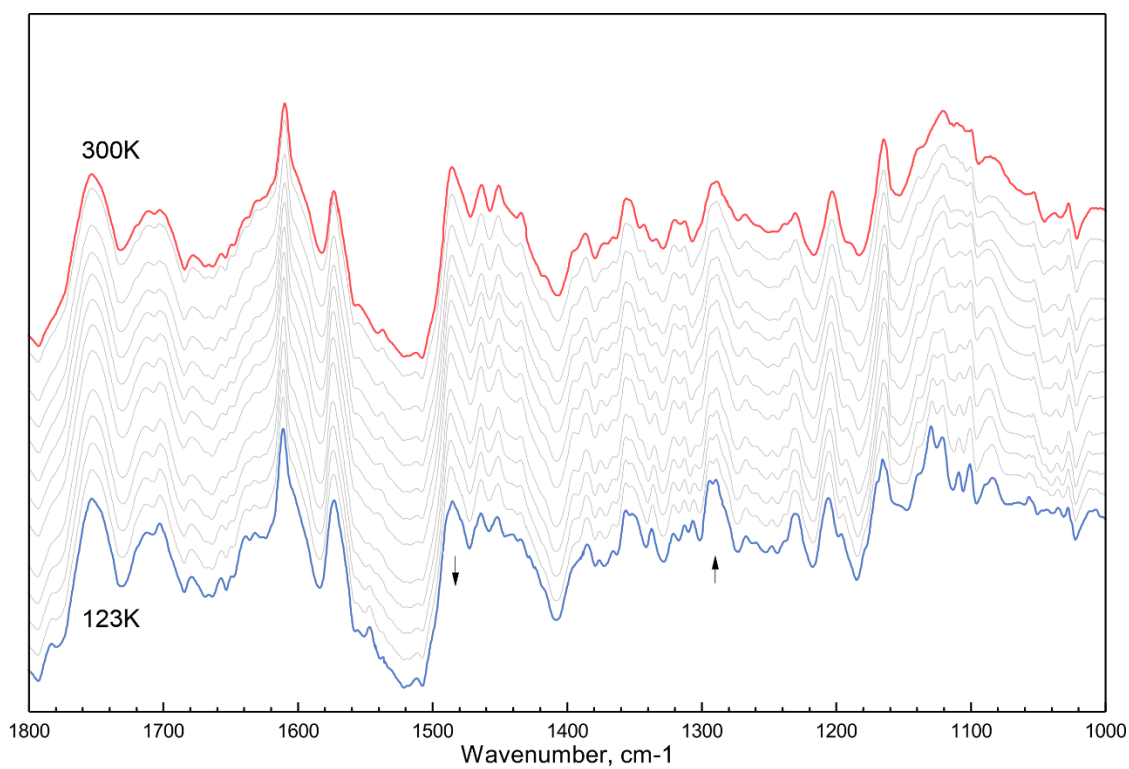

**Fig. S8** DRIFT spectra of **4** measured in the interval from 300 K to 123 K.



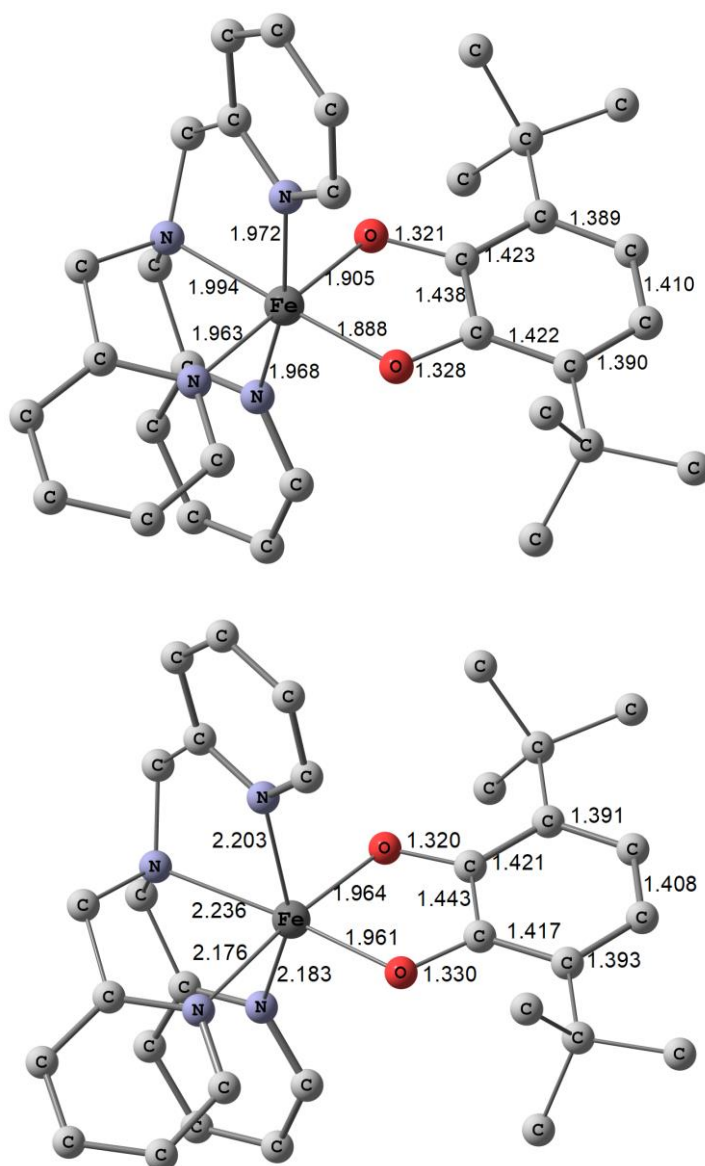

**Fig. S9** Optimized geometries of cation **3<sup>+</sup>** in the low-spin (top) and high-spin (bottom) states according to the DFT calculations (UTPSSh/6-311++G(d,p)). Bond lengths are given in Å.

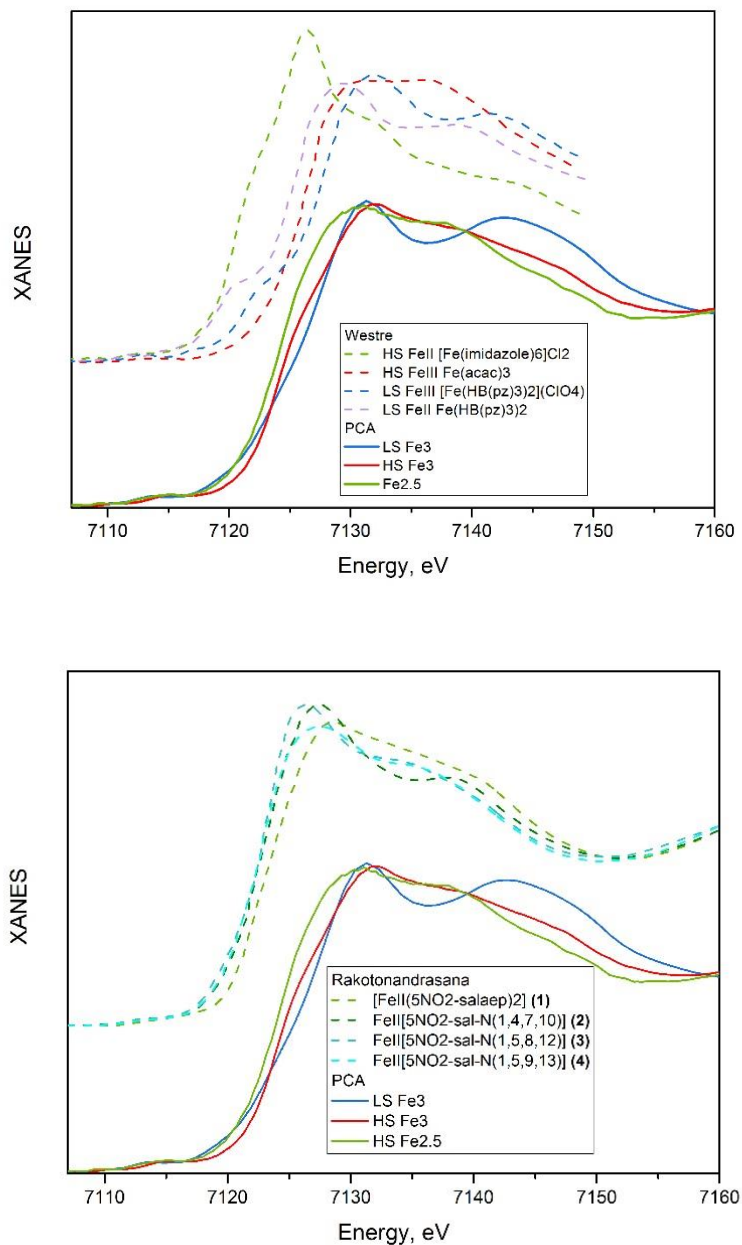

**Fig. S10** Comparison of three principal components derived from the series of experimental XANES spectra with experimental spectra from ref<sup>54</sup> and ref<sup>55</sup>, respectively.

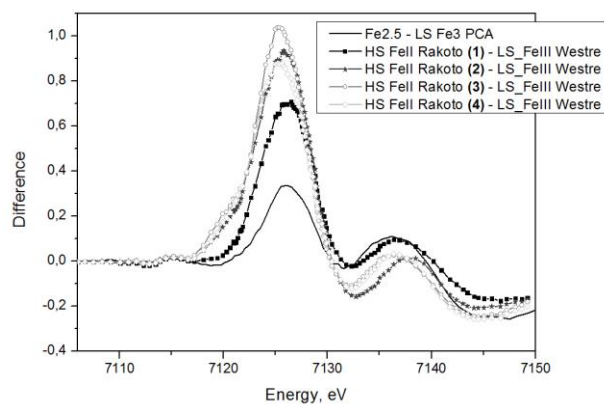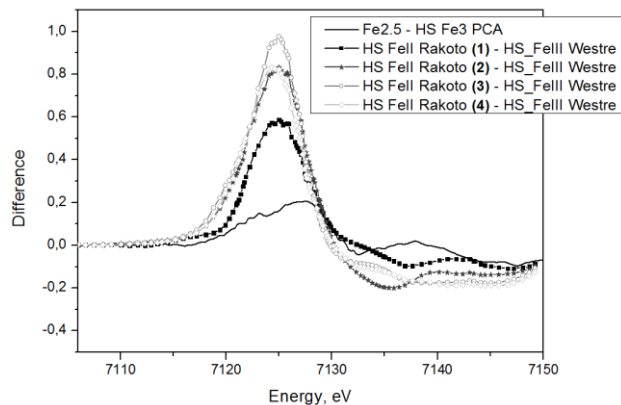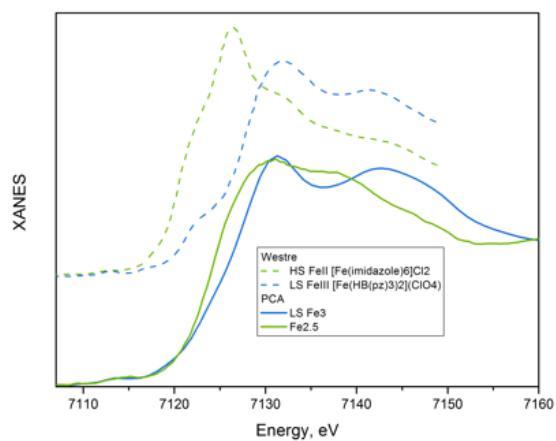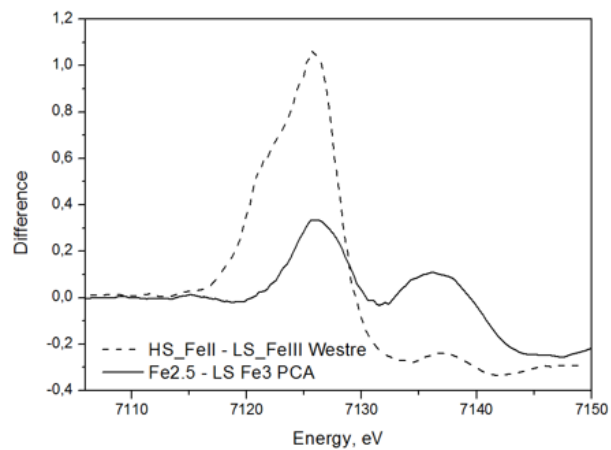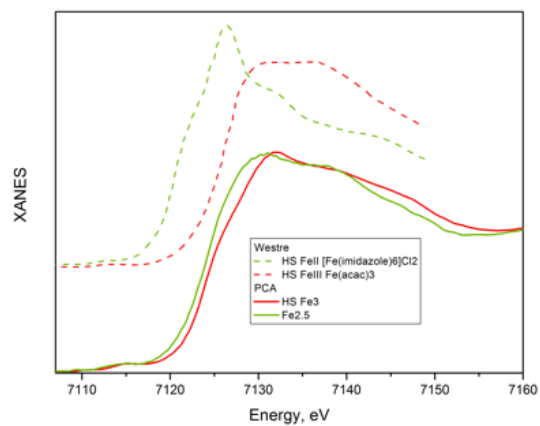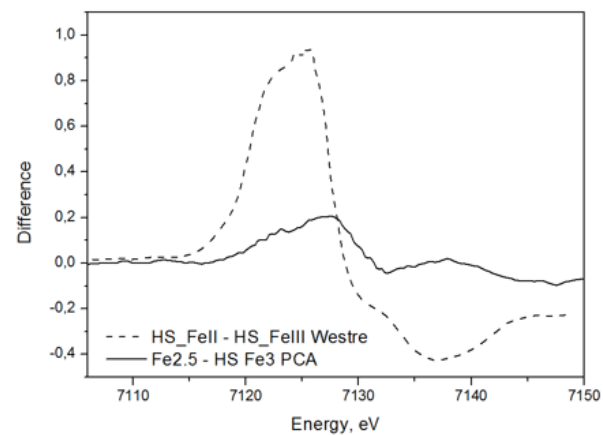

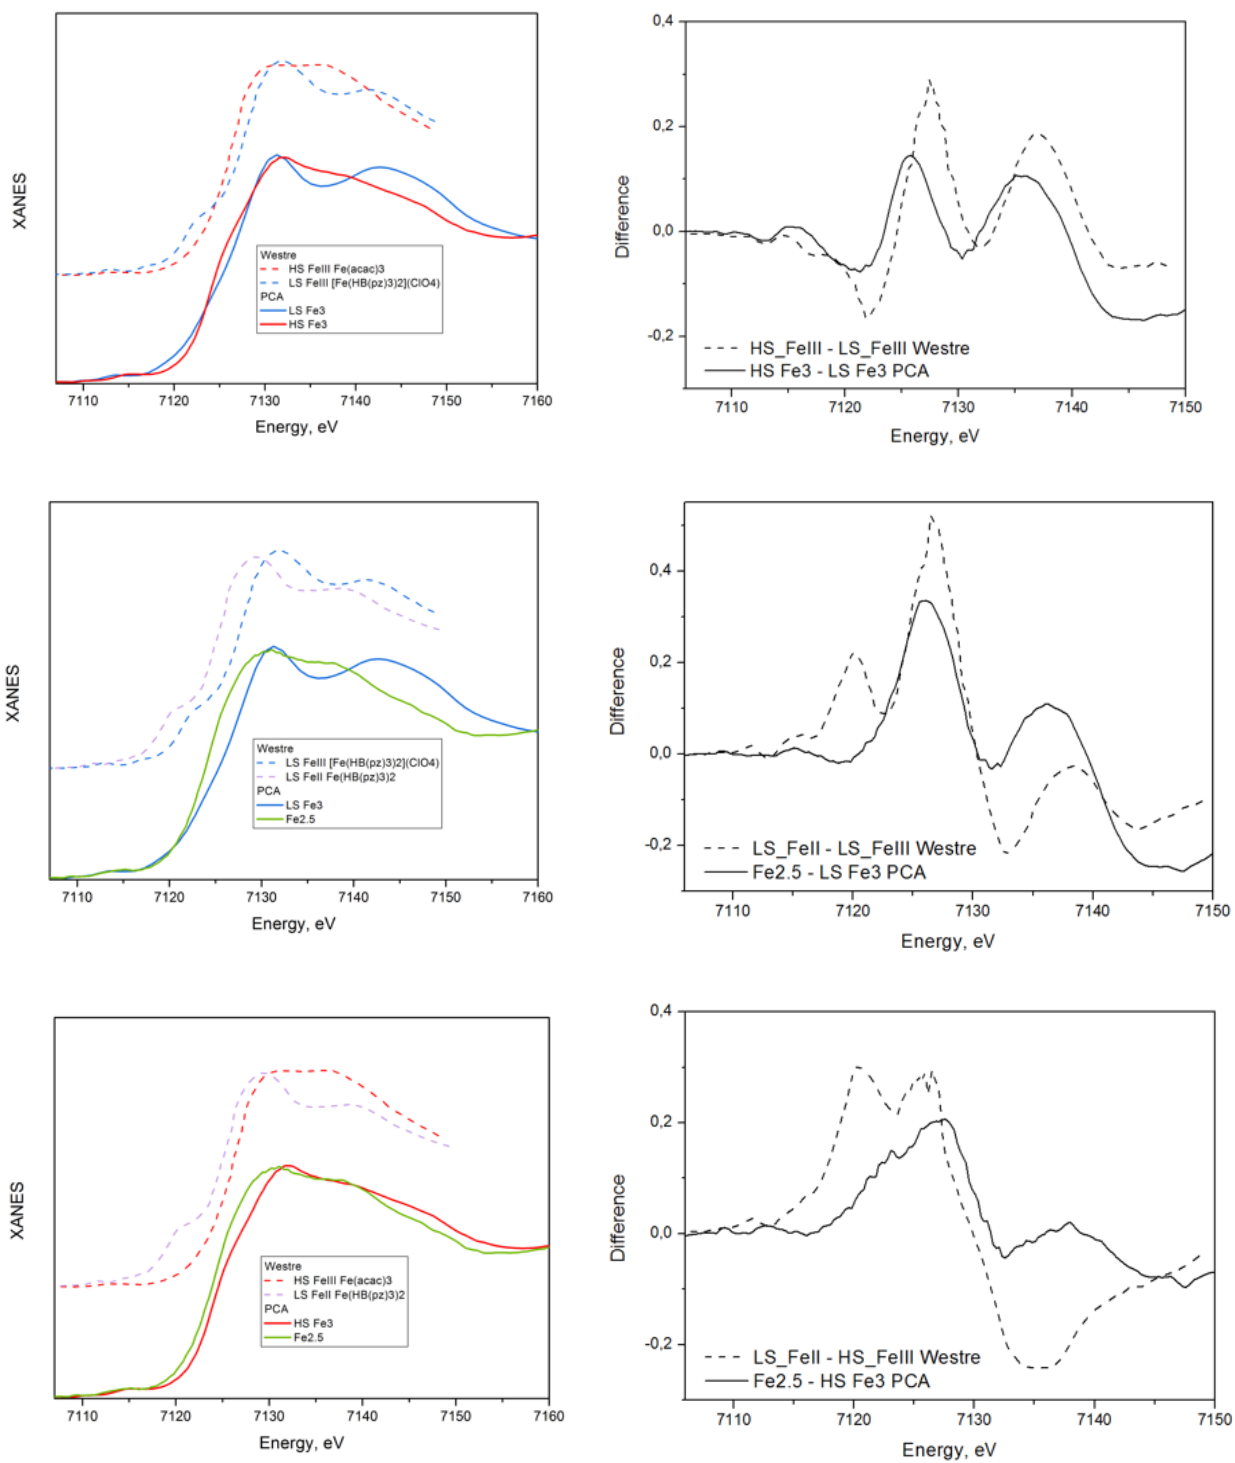

**Fig. S11** Comparison of difference spectra of PCA and references

## Cartesian coordinates:

Complex 1.  $\Delta E_{\text{hs-ls}} = 9.4$  kcal/mol

LS-state ( $E_{\text{total}} = -3816.895705$  a.u.)

|    |              |              |              |
|----|--------------|--------------|--------------|
| 15 | 5.623703000  | 0.599438000  | -0.310272000 |
| 9  | 6.292177000  | -0.540635000 | 0.644564000  |
| 9  | 4.728152000  | 1.142633000  | 0.992260000  |
| 9  | 4.856465000  | 1.733084000  | -1.242619000 |
| 9  | 6.427875000  | 0.053445000  | -1.607482000 |
| 9  | 4.367548000  | -0.448613000 | -0.645567000 |
| 9  | 6.795511000  | 1.655301000  | 0.046639000  |
| 26 | -0.565589000 | -0.335957000 | 0.315891000  |
| 8  | -2.172227000 | -1.161735000 | -0.232047000 |
| 8  | -1.525854000 | 1.289599000  | 0.062942000  |
| 7  | 1.106921000  | 0.555854000  | 0.934338000  |
| 7  | 0.444781000  | -2.009237000 | 0.499829000  |
| 7  | -1.006906000 | -0.255998000 | 2.235866000  |
| 7  | 0.243027000  | -0.174973000 | -1.470910000 |
| 6  | 2.070990000  | -0.487904000 | 1.432712000  |
| 1  | 3.095995000  | -0.203925000 | 1.193652000  |
| 1  | 1.978528000  | -0.524628000 | 2.523706000  |
| 6  | 1.726768000  | -1.848552000 | 0.896290000  |
| 6  | 2.645271000  | -2.894846000 | 0.856843000  |
| 1  | 3.676911000  | -2.711258000 | 1.132856000  |
| 6  | 2.214546000  | -4.148788000 | 0.434188000  |
| 1  | 2.911457000  | -4.978358000 | 0.388587000  |
| 6  | 0.881616000  | -4.318886000 | 0.057086000  |
| 1  | 0.508672000  | -5.279378000 | -0.278363000 |
| 6  | 0.029663000  | -3.223707000 | 0.089003000  |
| 1  | -1.006615000 | -3.277137000 | -0.222932000 |
| 6  | 0.688261000  | 1.439431000  | 2.055613000  |
| 1  | 1.546403000  | 1.805021000  | 2.630458000  |
| 1  | 0.160801000  | 2.290950000  | 1.618497000  |
| 6  | -0.282703000 | 0.666945000  | 2.914356000  |
| 6  | -0.467535000 | 0.883188000  | 4.274727000  |
| 1  | 0.139193000  | 1.618864000  | 4.790552000  |
| 6  | -1.437615000 | 0.144517000  | 4.952270000  |
| 1  | -1.601933000 | 0.298741000  | 6.012976000  |
| 6  | -2.185996000 | -0.794347000 | 4.246791000  |
| 1  | -2.951002000 | -1.387350000 | 4.733458000  |
| 6  | -1.939973000 | -0.969219000 | 2.889412000  |
| 1  | -2.491485000 | -1.679028000 | 2.285541000  |
| 6  | 1.657881000  | 1.326363000  | -0.226079000 |
| 1  | 2.724224000  | 1.526350000  | -0.108452000 |
| 1  | 1.116164000  | 2.276544000  | -0.259398000 |
| 6  | 1.362151000  | 0.584845000  | -1.501578000 |

|   |              |              |              |
|---|--------------|--------------|--------------|
| 6 | 2.135826000  | 0.707580000  | -2.651452000 |
| 1 | 3.057306000  | 1.275807000  | -2.611915000 |
| 6 | 1.717615000  | 0.057886000  | -3.809573000 |
| 1 | 2.305769000  | 0.133309000  | -4.717507000 |
| 6 | 0.546149000  | -0.697781000 | -3.783149000 |
| 1 | 0.186187000  | -1.214190000 | -4.665114000 |
| 6 | -0.158476000 | -0.802409000 | -2.591258000 |
| 1 | -1.065016000 | -1.387555000 | -2.499199000 |
| 6 | -3.146115000 | -0.293553000 | -0.478064000 |
| 6 | -4.455412000 | -0.672089000 | -0.882971000 |
| 6 | -5.339865000 | 0.377655000  | -1.100398000 |
| 6 | -4.978088000 | 1.731334000  | -0.940050000 |
| 6 | -3.707757000 | 2.135998000  | -0.550340000 |
| 6 | -2.776364000 | 1.086343000  | -0.312155000 |
| 6 | -3.319478000 | 3.610259000  | -0.387099000 |
| 6 | -2.882534000 | 3.880553000  | 1.071313000  |
| 1 | -2.030002000 | 3.256440000  | 1.343832000  |
| 1 | -3.703313000 | 3.668015000  | 1.764087000  |
| 1 | -2.599573000 | 4.932817000  | 1.188919000  |
| 6 | -4.494733000 | 4.551350000  | -0.705696000 |
| 1 | -5.344162000 | 4.384224000  | -0.035395000 |
| 1 | -4.839255000 | 4.435832000  | -1.738303000 |
| 1 | -4.168362000 | 5.588436000  | -0.577911000 |
| 6 | -2.160438000 | 3.958005000  | -1.349831000 |
| 1 | -1.873564000 | 5.008498000  | -1.226133000 |
| 1 | -2.467468000 | 3.809179000  | -2.389934000 |
| 1 | -1.288956000 | 3.331164000  | -1.155122000 |
| 6 | -4.855202000 | -2.141639000 | -1.070136000 |
| 6 | -6.324919000 | -2.285126000 | -1.504786000 |
| 1 | -6.515544000 | -1.791066000 | -2.462710000 |
| 1 | -7.011946000 | -1.872597000 | -0.759018000 |
| 1 | -6.561026000 | -3.347328000 | -1.624878000 |
| 6 | -4.680618000 | -2.913879000 | 0.257712000  |
| 1 | -5.302656000 | -2.472837000 | 1.043513000  |
| 1 | -3.638576000 | -2.895797000 | 0.582791000  |
| 1 | -4.985620000 | -3.958656000 | 0.128381000  |
| 6 | -3.976821000 | -2.794392000 | -2.162154000 |
| 1 | -4.266096000 | -3.842440000 | -2.300946000 |
| 1 | -2.921869000 | -2.760056000 | -1.883847000 |
| 1 | -4.103494000 | -2.276720000 | -3.118306000 |
| 1 | -5.739878000 | 2.476707000  | -1.136273000 |
| 1 | -6.356627000 | 0.166546000  | -1.409683000 |

HS-state ( $E_{\text{total}} = -3816.880695$  a.u.)

|    |             |              |              |
|----|-------------|--------------|--------------|
| 26 | 0.689549000 | 0.084606000  | 0.254574000  |
| 8  | 2.288995000 | 1.217185000  | 0.323446000  |
| 8  | 1.973455000 | -1.168309000 | -0.544044000 |

|    |              |              |              |
|----|--------------|--------------|--------------|
| 7  | -1.251703000 | -1.015935000 | 0.389700000  |
| 7  | -0.592128000 | 1.647397000  | 1.059881000  |
| 7  | 0.808697000  | -1.061601000 | 2.131986000  |
| 7  | -0.264544000 | 0.541943000  | -1.654764000 |
| 6  | -2.168714000 | -0.197993000 | 1.245862000  |
| 1  | -3.210014000 | -0.402158000 | 0.996235000  |
| 1  | -2.005991000 | -0.514341000 | 2.282349000  |
| 6  | -1.883452000 | 1.283082000  | 1.191304000  |
| 6  | -2.902496000 | 2.220325000  | 1.356900000  |
| 1  | -3.930813000 | 1.881599000  | 1.414516000  |
| 6  | -2.561899000 | 3.568906000  | 1.418379000  |
| 1  | -3.335749000 | 4.318998000  | 1.541665000  |
| 6  | -1.222332000 | 3.943130000  | 1.308363000  |
| 1  | -0.920125000 | 4.982911000  | 1.352791000  |
| 6  | -0.268297000 | 2.952119000  | 1.116474000  |
| 1  | 0.785561000  | 3.177009000  | 0.994109000  |
| 6  | -0.968914000 | -2.307965000 | 1.055807000  |
| 1  | -1.889619000 | -2.820746000 | 1.360223000  |
| 1  | -0.448004000 | -2.945708000 | 0.333759000  |
| 6  | -0.054692000 | -2.089513000 | 2.242494000  |
| 6  | -0.064506000 | -2.920897000 | 3.360583000  |
| 1  | -0.783083000 | -3.730385000 | 3.426715000  |
| 6  | 0.855937000  | -2.690456000 | 4.380325000  |
| 1  | 0.867737000  | -3.324511000 | 5.260239000  |
| 6  | 1.755294000  | -1.633220000 | 4.256094000  |
| 1  | 2.486878000  | -1.420065000 | 5.026273000  |
| 6  | 1.696101000  | -0.840550000 | 3.115609000  |
| 1  | 2.370169000  | -0.004539000 | 2.963723000  |
| 6  | -1.799233000 | -1.214890000 | -0.982015000 |
| 1  | -2.879211000 | -1.374933000 | -0.955606000 |
| 1  | -1.324994000 | -2.114109000 | -1.390865000 |
| 6  | -1.445270000 | -0.061827000 | -1.890758000 |
| 6  | -2.262410000 | 0.309857000  | -2.957443000 |
| 1  | -3.228105000 | -0.164027000 | -3.084203000 |
| 6  | -1.826706000 | 1.316273000  | -3.813483000 |
| 1  | -2.447923000 | 1.629500000  | -4.645553000 |
| 6  | -0.592887000 | 1.924258000  | -3.581080000 |
| 1  | -0.218995000 | 2.710080000  | -4.226733000 |
| 6  | 0.153945000  | 1.513659000  | -2.484922000 |
| 1  | 1.113152000  | 1.959733000  | -2.244885000 |
| 6  | 3.392560000  | 0.633411000  | -0.134074000 |
| 6  | 4.664634000  | 1.257397000  | -0.152682000 |
| 6  | 5.705437000  | 0.490063000  | -0.671705000 |
| 6  | 5.527502000  | -0.821154000 | -1.152389000 |
| 6  | 4.294540000  | -1.464275000 | -1.148883000 |
| 6  | 3.209232000  | -0.711371000 | -0.624174000 |
| 15 | -5.833882000 | -0.361537000 | -0.326916000 |
| 9  | -4.822128000 | -1.632061000 | 0.059294000  |
| 9  | -5.542860000 | 0.263218000  | 1.179254000  |

|   |              |              |              |
|---|--------------|--------------|--------------|
| 9 | -7.102163000 | -1.191699000 | 0.235756000  |
| 9 | -6.759272000 | 0.918311000  | -0.694652000 |
| 9 | -6.021700000 | -0.984804000 | -1.821698000 |
| 9 | -4.482599000 | 0.461847000  | -0.864039000 |
| 1 | 6.400009000  | -1.335648000 | -1.537784000 |
| 1 | 6.704705000  | 0.907238000  | -0.715693000 |
| 6 | 4.095923000  | -2.891158000 | -1.672769000 |
| 6 | 3.079739000  | -2.885018000 | -2.838784000 |
| 1 | 3.449891000  | -2.271893000 | -3.666860000 |
| 1 | 2.116444000  | -2.486927000 | -2.515773000 |
| 1 | 2.932964000  | -3.905639000 | -3.210545000 |
| 6 | 3.572640000  | -3.798671000 | -0.534514000 |
| 1 | 2.621507000  | -3.428639000 | -0.147903000 |
| 1 | 4.293355000  | -3.836398000 | 0.289131000  |
| 1 | 3.428278000  | -4.818986000 | -0.907998000 |
| 6 | 5.410796000  | -3.497560000 | -2.193435000 |
| 1 | 5.218629000  | -4.511648000 | -2.558104000 |
| 1 | 6.168561000  | -3.563700000 | -1.405924000 |
| 1 | 5.824141000  | -2.917359000 | -3.024682000 |
| 6 | 4.867732000  | 2.687428000  | 0.365023000  |
| 6 | 6.335536000  | 3.136181000  | 0.253186000  |
| 1 | 6.682598000  | 3.135972000  | -0.785036000 |
| 1 | 7.002265000  | 2.497528000  | 0.841483000  |
| 1 | 6.429069000  | 4.157824000  | 0.635336000  |
| 6 | 4.459970000  | 2.772670000  | 1.854485000  |
| 1 | 5.076800000  | 2.099717000  | 2.459459000  |
| 1 | 3.411070000  | 2.501555000  | 1.987674000  |
| 1 | 4.607547000  | 3.793452000  | 2.225294000  |
| 6 | 4.008383000  | 3.671055000  | -0.462445000 |
| 1 | 4.140697000  | 4.692605000  | -0.087700000 |
| 1 | 2.950337000  | 3.410179000  | -0.399673000 |
| 1 | 4.310302000  | 3.653050000  | -1.514703000 |

Complex 2.  $\Delta E_{\text{HS-LS}} = 10.6$  kcal/mol

LS-state ( $E_{\text{total}} = -3827.850884$  a.u.)

|    |             |              |              |
|----|-------------|--------------|--------------|
| 26 | 2.081499000 | -0.561593000 | 0.016941000  |
| 8  | 3.942798000 | -0.885929000 | -0.068644000 |
| 8  | 2.588260000 | 1.273570000  | 0.023675000  |
| 7  | 0.124393000 | -0.181458000 | 0.108666000  |
| 7  | 1.956253000 | -0.537430000 | 1.977621000  |
| 7  | 1.566081000 | -2.444773000 | 0.014565000  |
| 7  | 1.778482000 | -0.472173000 | -1.927093000 |
| 6  | 4.666090000 | 0.226272000  | -0.060943000 |
| 6  | 6.087374000 | 0.244385000  | -0.104737000 |
| 6  | 6.668018000 | 1.506642000  | -0.090803000 |



|   |              |              |              |
|---|--------------|--------------|--------------|
| 6 | 5.915031000  | 2.698805000  | -0.038831000 |
| 6 | 4.527343000  | 2.718181000  | 0.003403000  |
| 6 | 3.897264000  | 1.441663000  | -0.008313000 |
| 6 | 6.916297000  | -1.045691000 | -0.165610000 |
| 6 | 6.562032000  | -1.843162000 | -1.441977000 |
| 6 | 6.633679000  | -1.919062000 | 1.078302000  |
| 6 | 8.427630000  | -0.754856000 | -0.198611000 |
| 6 | 3.715407000  | 4.017724000  | 0.057479000  |
| 6 | 2.861181000  | 4.051758000  | 1.346035000  |
| 6 | 2.794110000  | 4.112995000  | -1.180856000 |
| 6 | 4.624292000  | 5.259771000  | 0.064001000  |
| 6 | -0.093686000 | 0.576638000  | 1.379709000  |
| 6 | 0.806357000  | 0.004846000  | 2.443523000  |
| 6 | 0.528824000  | 0.071557000  | 3.804630000  |
| 6 | 1.472286000  | -0.412349000 | 4.709112000  |
| 6 | 2.660796000  | -0.954833000 | 4.224715000  |
| 6 | 2.865173000  | -1.005880000 | 2.851281000  |
| 6 | -0.659776000 | -1.467987000 | 0.096773000  |
| 6 | 0.237152000  | -2.676851000 | 0.057117000  |
| 6 | -0.278534000 | -3.973351000 | 0.053737000  |
| 6 | 0.600757000  | -5.049604000 | 0.015052000  |
| 6 | 1.974807000  | -4.802968000 | -0.023684000 |
| 6 | 2.419140000  | -3.489720000 | -0.025250000 |
| 6 | -0.179360000 | 0.648479000  | -1.095773000 |
| 6 | 0.605283000  | 0.113788000  | -2.262586000 |
| 6 | 0.209773000  | 0.253069000  | -3.588770000 |
| 6 | 1.055695000  | -0.206786000 | -4.596006000 |
| 6 | 2.267780000  | -0.798279000 | -4.245075000 |
| 6 | 2.593623000  | -0.917437000 | -2.899548000 |
| 1 | 7.747094000  | 1.600473000  | -0.120957000 |
| 1 | 6.462825000  | 3.633862000  | -0.032273000 |
| 1 | 7.168284000  | -2.754623000 | -1.495845000 |
| 1 | 5.507938000  | -2.127658000 | -1.441801000 |
| 1 | 6.764021000  | -1.246223000 | -2.337069000 |
| 1 | 7.234696000  | -2.834842000 | 1.039506000  |
| 1 | 6.894132000  | -1.379763000 | 1.994736000  |
| 1 | 5.579493000  | -2.199232000 | 1.124026000  |
| 1 | 8.710700000  | -0.169212000 | -1.078925000 |
| 1 | 8.757428000  | -0.217228000 | 0.695982000  |
| 1 | 8.974001000  | -1.702685000 | -0.238689000 |
| 1 | 2.178496000  | 3.201532000  | 1.384306000  |
| 1 | 3.502239000  | 4.021749000  | 2.233017000  |
| 1 | 2.273043000  | 4.975625000  | 1.380883000  |
| 1 | 2.108090000  | 3.265661000  | -1.222872000 |
| 1 | 2.207610000  | 5.037728000  | -1.141213000 |
| 1 | 3.387291000  | 4.124337000  | -2.100921000 |
| 1 | 5.237444000  | 5.319916000  | -0.841007000 |
| 1 | 4.001770000  | 6.159076000  | 0.105570000  |
| 1 | 5.287936000  | 5.273018000  | 0.934676000  |

|   |               |              |              |
|---|---------------|--------------|--------------|
| 1 | 0.218773000   | 1.607903000  | 1.193144000  |
| 1 | -1.146152000  | 0.573399000  | 1.682598000  |
| 1 | -0.416315000  | 0.488770000  | 4.132692000  |
| 1 | 1.279545000   | -0.368726000 | 5.775525000  |
| 1 | 3.421890000   | -1.337570000 | 4.894206000  |
| 1 | 3.766987000   | -1.414335000 | 2.412679000  |
| 1 | -1.304108000  | -1.501201000 | 0.979670000  |
| 1 | -1.335529000  | -1.477734000 | -0.765151000 |
| 1 | -1.353052000  | -4.117668000 | 0.067353000  |
| 1 | 0.221871000   | -6.065802000 | 0.011792000  |
| 1 | 2.693400000   | -5.613319000 | -0.055685000 |
| 1 | 3.469285000   | -3.225628000 | -0.058996000 |
| 1 | -1.251941000  | 0.690274000  | -1.301288000 |
| 1 | 0.178263000   | 1.659827000  | -0.884537000 |
| 1 | -0.742904000  | 0.716486000  | -3.817720000 |
| 1 | 0.771040000   | -0.106681000 | -5.637615000 |
| 1 | 2.955546000   | -1.165039000 | -4.997618000 |
| 1 | 3.522088000   | -1.362232000 | -2.563504000 |
| 6 | -6.469797000  | 0.065206000  | 0.239440000  |
| 6 | -7.267326000  | -0.560728000 | -0.741160000 |
| 6 | -8.648642000  | -0.714955000 | -0.601269000 |
| 6 | -9.293836000  | -0.247648000 | 0.544330000  |
| 6 | -8.535483000  | 0.372058000  | 1.537645000  |
| 6 | -7.154981000  | 0.520994000  | 1.381468000  |
| 6 | -4.122199000  | 0.401964000  | 1.496542000  |
| 6 | -3.639611000  | -0.706382000 | 2.223736000  |
| 6 | -3.170960000  | -0.609563000 | 3.538833000  |
| 6 | -3.149070000  | 0.626401000  | 4.188163000  |
| 6 | -3.598656000  | 1.753234000  | 3.496229000  |
| 6 | -4.072278000  | 1.634048000  | 2.186889000  |
| 6 | -4.261906000  | -0.994600000 | -0.855795000 |
| 6 | -4.527473000  | -2.327160000 | -0.465242000 |
| 6 | -4.054217000  | -3.433288000 | -1.174905000 |
| 6 | -3.299952000  | -3.254651000 | -2.338589000 |
| 6 | -3.047084000  | -1.954944000 | -2.778358000 |
| 6 | -3.519749000  | -0.857498000 | -2.046330000 |
| 6 | -4.588477000  | 1.673868000  | -0.864619000 |
| 6 | -5.523500000  | 2.165270000  | -1.796316000 |
| 6 | -5.269915000  | 3.279175000  | -2.600975000 |
| 6 | -4.056098000  | 3.961414000  | -2.503918000 |
| 6 | -3.107860000  | 3.513865000  | -1.583147000 |
| 6 | -3.380471000  | 2.396492000  | -0.788253000 |
| 5 | -4.846930000  | 0.292754000  | 0.008015000  |
| 1 | -6.793134000  | -0.944754000 | -1.641310000 |
| 1 | -9.220836000  | -1.202716000 | -1.386660000 |
| 1 | -10.367057000 | -0.367481000 | 0.661971000  |
| 1 | -9.019034000  | 0.738685000  | 2.439781000  |
| 1 | -6.596872000  | 1.003067000  | 2.179520000  |
| 1 | -3.662665000  | -1.690471000 | 1.763601000  |

|   |              |              |              |
|---|--------------|--------------|--------------|
| 1 | -2.842853000 | -1.504992000 | 4.062541000  |
| 1 | -2.815012000 | 0.707159000  | 5.219510000  |
| 1 | -3.600754000 | 2.724748000  | 3.984134000  |
| 1 | -4.433780000 | 2.527443000  | 1.685513000  |
| 1 | -5.161187000 | -2.501816000 | 0.400430000  |
| 1 | -4.302081000 | -4.437587000 | -0.838364000 |
| 1 | -2.949894000 | -4.110441000 | -2.909026000 |
| 1 | -2.500642000 | -1.795992000 | -3.705410000 |
| 1 | -3.339201000 | 0.143719000  | -2.431704000 |
| 1 | -6.482874000 | 1.664340000  | -1.889547000 |
| 1 | -6.027413000 | 3.620892000  | -3.301790000 |
| 1 | -3.859826000 | 4.833252000  | -3.121354000 |
| 1 | -2.164633000 | 4.045476000  | -1.473450000 |
| 1 | -2.636527000 | 2.090616000  | -0.055526000 |

HS-state ( $E_{\text{total}} = -3827.833978$  a.u.)

|   |               |              |              |
|---|---------------|--------------|--------------|
| 6 | -6.511345000  | 0.380959000  | 0.648151000  |
| 6 | -7.413841000  | -0.699003000 | 0.672094000  |
| 6 | -8.727990000  | -0.568312000 | 1.128407000  |
| 6 | -9.195657000  | 0.664049000  | 1.585203000  |
| 6 | -8.328362000  | 1.757035000  | 1.579122000  |
| 6 | -7.016710000  | 1.609518000  | 1.121811000  |
| 6 | -4.010876000  | 1.310107000  | 0.905015000  |
| 6 | -3.973788000  | 1.297473000  | 2.319042000  |
| 6 | -3.181237000  | 2.174414000  | 3.063553000  |
| 6 | -2.401339000  | 3.139643000  | 2.419238000  |
| 6 | -2.444977000  | 3.213391000  | 1.026669000  |
| 6 | -3.229643000  | 2.312395000  | 0.296281000  |
| 6 | -4.470578000  | -1.311356000 | 0.222996000  |
| 6 | -3.800826000  | -1.812814000 | 1.358219000  |
| 6 | -3.510129000  | -3.170005000 | 1.536063000  |
| 6 | -3.876533000  | -4.100313000 | 0.562052000  |
| 6 | -4.526530000  | -3.643610000 | -0.587366000 |
| 6 | -4.810650000  | -2.284547000 | -0.744084000 |
| 6 | -4.944725000  | 0.696413000  | -1.542650000 |
| 6 | -5.872933000  | 1.599479000  | -2.095772000 |
| 6 | -5.810529000  | 2.024740000  | -3.425417000 |
| 6 | -4.809204000  | 1.550489000  | -4.273956000 |
| 6 | -3.875763000  | 0.645147000  | -3.766945000 |
| 6 | -3.949089000  | 0.239376000  | -2.430655000 |
| 5 | -4.971053000  | 0.262198000  | 0.053836000  |
| 1 | -7.083234000  | -1.676319000 | 0.330782000  |
| 1 | -9.387090000  | -1.433040000 | 1.130139000  |
| 1 | -10.215795000 | 0.769947000  | 1.943100000  |
| 1 | -8.672046000  | 2.725750000  | 1.933485000  |
| 1 | -6.362213000  | 2.477826000  | 1.139154000  |
| 1 | -4.620687000  | 0.605544000  | 2.852712000  |
| 1 | -3.197724000  | 2.129673000  | 4.150102000  |

|    |              |              |              |
|----|--------------|--------------|--------------|
| 1  | -1.802509000 | 3.840634000  | 2.993697000  |
| 1  | -1.884391000 | 3.988657000  | 0.508236000  |
| 1  | -3.265395000 | 2.413669000  | -0.785790000 |
| 1  | -3.523039000 | -1.125094000 | 2.152381000  |
| 1  | -3.014419000 | -3.502785000 | 2.445466000  |
| 1  | -3.679737000 | -5.159756000 | 0.704299000  |
| 1  | -4.830828000 | -4.350190000 | -1.355736000 |
| 1  | -5.331270000 | -1.965909000 | -1.642849000 |
| 1  | -6.675431000 | 1.975754000  | -1.467602000 |
| 1  | -6.554538000 | 2.721017000  | -3.803797000 |
| 1  | -4.768317000 | 1.865911000  | -5.312647000 |
| 1  | -3.106409000 | 0.236261000  | -4.419709000 |
| 1  | -3.224575000 | -0.488980000 | -2.071471000 |
| 26 | 2.210299000  | -0.389314000 | -0.202637000 |
| 8  | 4.102960000  | -0.915457000 | -0.250057000 |
| 8  | 3.009364000  | 1.344432000  | 0.226451000  |
| 7  | -0.015454000 | -0.133520000 | -0.228181000 |
| 7  | 1.573509000  | -2.444161000 | -0.547966000 |
| 7  | 1.760736000  | 0.250760000  | -2.246059000 |
| 7  | 1.638642000  | -0.738042000 | 1.880613000  |
| 6  | -0.628837000 | -1.399450000 | -0.732802000 |
| 1  | -1.611668000 | -1.560218000 | -0.276156000 |
| 1  | -0.794811000 | -1.278116000 | -1.808723000 |
| 6  | 0.239792000  | -2.625350000 | -0.560198000 |
| 6  | -0.326823000 | -3.899170000 | -0.506597000 |
| 1  | -1.406578000 | -4.005521000 | -0.490605000 |
| 6  | 0.514735000  | -5.007021000 | -0.462330000 |
| 1  | 0.096581000  | -6.007193000 | -0.420212000 |
| 6  | 1.896413000  | -4.815495000 | -0.465622000 |
| 1  | 2.584209000  | -5.652169000 | -0.432297000 |
| 6  | 2.385382000  | -3.516006000 | -0.499364000 |
| 1  | 3.446448000  | -3.292965000 | -0.482957000 |
| 6  | -0.292319000 | 0.977779000  | -1.177161000 |
| 1  | -1.355287000 | 1.041484000  | -1.430668000 |
| 1  | -0.015019000 | 1.911720000  | -0.678392000 |
| 6  | 0.553422000  | 0.824194000  | -2.419713000 |
| 6  | 0.134272000  | 1.290647000  | -3.664857000 |
| 1  | -0.852275000 | 1.728283000  | -3.771044000 |
| 6  | 0.997277000  | 1.173531000  | -4.751509000 |
| 1  | 0.694603000  | 1.529567000  | -5.730358000 |
| 6  | 2.249133000  | 0.588090000  | -4.565790000 |
| 1  | 2.948983000  | 0.478234000  | -5.385595000 |
| 6  | 2.591302000  | 0.137803000  | -3.296422000 |
| 1  | 3.551436000  | -0.323936000 | -3.092510000 |
| 6  | -0.481718000 | 0.197670000  | 1.145956000  |
| 1  | -1.544363000 | -0.030537000 | 1.271631000  |
| 1  | -0.381674000 | 1.278880000  | 1.283921000  |
| 6  | 0.355542000  | -0.484629000 | 2.200080000  |
| 6  | -0.151459000 | -0.762395000 | 3.470026000  |

|   |              |              |              |
|---|--------------|--------------|--------------|
| 1 | -1.190524000 | -0.544209000 | 3.689440000  |
| 6 | 0.697014000  | -1.305154000 | 4.429954000  |
| 1 | 0.325404000  | -1.529097000 | 5.424159000  |
| 6 | 2.028142000  | -1.557677000 | 4.096889000  |
| 1 | 2.721810000  | -1.976305000 | 4.816304000  |
| 6 | 2.457466000  | -1.260910000 | 2.810114000  |
| 1 | 3.480238000  | -1.435469000 | 2.493767000  |
| 6 | 4.949433000  | 0.071187000  | 0.034609000  |
| 6 | 6.356982000  | -0.083613000 | 0.077470000  |
| 6 | 7.080124000  | 1.063956000  | 0.397163000  |
| 6 | 6.473017000  | 2.305980000  | 0.662677000  |
| 6 | 5.095888000  | 2.495077000  | 0.626704000  |
| 6 | 4.326723000  | 1.344309000  | 0.304385000  |
| 1 | 7.122334000  | 3.139465000  | 0.903687000  |
| 1 | 8.161642000  | 1.016094000  | 0.447950000  |
| 6 | 4.431745000  | 3.846873000  | 0.912148000  |
| 6 | 3.474269000  | 3.719659000  | 2.120251000  |
| 1 | 4.024017000  | 3.409699000  | 3.015079000  |
| 1 | 2.688550000  | 2.988501000  | 1.923828000  |
| 1 | 3.006624000  | 4.688941000  | 2.327038000  |
| 6 | 3.638338000  | 4.313346000  | -0.330709000 |
| 1 | 2.865090000  | 3.589746000  | -0.593764000 |
| 1 | 4.306833000  | 4.438243000  | -1.188910000 |
| 1 | 3.161108000  | 5.278608000  | -0.127102000 |
| 6 | 5.469981000  | 4.932818000  | 1.245945000  |
| 1 | 4.951323000  | 5.876485000  | 1.442305000  |
| 1 | 6.164681000  | 5.101272000  | 0.416536000  |
| 1 | 6.050755000  | 4.679454000  | 2.138869000  |
| 6 | 7.029213000  | -1.432278000 | -0.212028000 |
| 6 | 8.562662000  | -1.343952000 | -0.114490000 |
| 1 | 8.891223000  | -1.053463000 | 0.888529000  |
| 1 | 8.975129000  | -0.630035000 | -0.834583000 |
| 1 | 8.993208000  | -2.326088000 | -0.335112000 |
| 6 | 6.673539000  | -1.900991000 | -1.641736000 |
| 1 | 7.034790000  | -1.179657000 | -2.382057000 |
| 1 | 5.593649000  | -2.009140000 | -1.758435000 |
| 1 | 7.147820000  | -2.867248000 | -1.849143000 |
| 6 | 6.551479000  | -2.486671000 | 0.812921000  |
| 1 | 7.022489000  | -3.454499000 | 0.605392000  |
| 1 | 5.467518000  | -2.608556000 | 0.768469000  |
| 1 | 6.826979000  | -2.185661000 | 1.828946000  |

**Complex 3.**  $\Delta E_{\text{hs-ls}} = 8.8$  kcal/mol

LS-state ( $E_{\text{total}} = -3636.970118$  a.u.)

|    |              |              |             |
|----|--------------|--------------|-------------|
| 26 | -0.190635000 | -0.194782000 | 0.358613000 |
|----|--------------|--------------|-------------|

|   |              |              |              |
|---|--------------|--------------|--------------|
| 8 | -1.673969000 | -1.250799000 | -0.142419000 |
| 8 | -1.359611000 | 1.273633000  | 0.040125000  |
| 7 | 1.349185000  | 0.944658000  | 0.924942000  |
| 7 | 1.040720000  | -1.705435000 | 0.609157000  |
| 7 | -0.629022000 | -0.096509000 | 2.276845000  |
| 7 | 0.585290000  | -0.004816000 | -1.440029000 |
| 6 | 2.446109000  | 0.063854000  | 1.459984000  |
| 1 | 3.438649000  | 0.455371000  | 1.218800000  |
| 1 | 2.358128000  | 0.058019000  | 2.552163000  |
| 6 | 2.290249000  | -1.353619000 | 0.983312000  |
| 6 | 3.348078000  | -2.259411000 | 0.977020000  |
| 1 | 4.344528000  | -1.907309000 | 1.219009000  |
| 6 | 3.091623000  | -3.577951000 | 0.614402000  |
| 1 | 3.897649000  | -4.302987000 | 0.590792000  |
| 6 | 1.792467000  | -3.948925000 | 0.263731000  |
| 1 | 1.554716000  | -4.966029000 | -0.024985000 |
| 6 | 0.795969000  | -2.982936000 | 0.257224000  |
| 1 | -0.224217000 | -3.193848000 | -0.040014000 |
| 6 | 0.810685000  | 1.808229000  | 2.009516000  |
| 1 | 1.607425000  | 2.318318000  | 2.563160000  |
| 1 | 0.166284000  | 2.555235000  | 1.538741000  |
| 6 | -0.036980000 | 0.944461000  | 2.910515000  |
| 6 | -0.242539000 | 1.186808000  | 4.263400000  |
| 1 | 0.258153000  | 2.019362000  | 4.744627000  |
| 6 | -1.097649000 | 0.348594000  | 4.979107000  |
| 1 | -1.276327000 | 0.520812000  | 6.034732000  |
| 6 | -1.713034000 | -0.711682000 | 4.318574000  |
| 1 | -2.386366000 | -1.384401000 | 4.836062000  |
| 6 | -1.451303000 | -0.905313000 | 2.966635000  |
| 1 | -1.901537000 | -1.707543000 | 2.395279000  |
| 6 | 1.790997000  | 1.728335000  | -0.271451000 |
| 1 | 2.834230000  | 2.049287000  | -0.185373000 |
| 1 | 1.139495000  | 2.604932000  | -0.338356000 |
| 6 | 1.590576000  | 0.897673000  | -1.510395000 |
| 6 | 2.351660000  | 1.063296000  | -2.662232000 |
| 1 | 3.194740000  | 1.743109000  | -2.645406000 |
| 6 | 2.034238000  | 0.307759000  | -3.787389000 |
| 1 | 2.618703000  | 0.410253000  | -4.694818000 |
| 6 | 0.973337000  | -0.593957000 | -3.723540000 |
| 1 | 0.693641000  | -1.198933000 | -4.577869000 |
| 6 | 0.280711000  | -0.734599000 | -2.528033000 |
| 1 | -0.538254000 | -1.432733000 | -2.408990000 |
| 6 | -2.745005000 | -0.530792000 | -0.454767000 |
| 6 | -3.984688000 | -1.095558000 | -0.861373000 |
| 6 | -4.989644000 | -0.181287000 | -1.156012000 |
| 6 | -4.808895000 | 1.213929000  | -1.063491000 |
| 6 | -3.612609000 | 1.798148000  | -0.666952000 |
| 6 | -2.561764000 | 0.891313000  | -0.354144000 |
| 6 | -3.420895000 | 3.316464000  | -0.570899000 |

|    |              |              |              |
|----|--------------|--------------|--------------|
| 6  | -3.083098000 | 3.710250000  | 0.885662000  |
| 1  | -2.178133000 | 3.203322000  | 1.224413000  |
| 1  | -3.903597000 | 3.438621000  | 1.557773000  |
| 1  | -2.928092000 | 4.793043000  | 0.955558000  |
| 6  | -4.691536000 | 4.082414000  | -0.981299000 |
| 1  | -5.540565000 | 3.840573000  | -0.333714000 |
| 1  | -4.974681000 | 3.872429000  | -2.017655000 |
| 1  | -4.504463000 | 5.157886000  | -0.897798000 |
| 6  | -2.276778000 | 3.764242000  | -1.509990000 |
| 1  | -2.133042000 | 4.848167000  | -1.433969000 |
| 1  | -2.518817000 | 3.525176000  | -2.550455000 |
| 1  | -1.341077000 | 3.266459000  | -1.251333000 |
| 6  | -4.189999000 | -2.612609000 | -0.972055000 |
| 6  | -5.620688000 | -2.965791000 | -1.416799000 |
| 1  | -5.851520000 | -2.555374000 | -2.404830000 |
| 1  | -6.368700000 | -2.600172000 | -0.706160000 |
| 1  | -5.720335000 | -4.054503000 | -1.476186000 |
| 6  | -3.942418000 | -3.285118000 | 0.397726000  |
| 1  | -4.634039000 | -2.892908000 | 1.150544000  |
| 1  | -2.919052000 | -3.109548000 | 0.734599000  |
| 1  | -4.102010000 | -4.366545000 | 0.318575000  |
| 6  | -3.213395000 | -3.203453000 | -2.014891000 |
| 1  | -3.370913000 | -4.284144000 | -2.107957000 |
| 1  | -2.177216000 | -3.029415000 | -1.718570000 |
| 1  | -3.378013000 | -2.749042000 | -2.997104000 |
| 1  | -5.652222000 | 1.844205000  | -1.319979000 |
| 1  | -5.961497000 | -0.537483000 | -1.476202000 |
| 17 | 5.644160000  | 0.641891000  | -0.535447000 |
| 8  | 7.052414000  | 0.769607000  | -0.962768000 |
| 8  | 5.567467000  | 0.236430000  | 0.917076000  |
| 8  | 4.927321000  | 1.962022000  | -0.689910000 |
| 8  | 4.921155000  | -0.386064000 | -1.353533000 |

HS-state ( $E_{\text{total}} = -3636.956156$  a.u.)

|    |              |              |              |
|----|--------------|--------------|--------------|
| 26 | 0.331335000  | 0.122647000  | 0.265942000  |
| 8  | 1.969868000  | 1.199309000  | 0.286657000  |
| 8  | 1.556346000  | -1.192360000 | -0.519625000 |
| 7  | -1.637511000 | -0.905259000 | 0.467291000  |
| 7  | -0.883094000 | 1.759173000  | 1.046627000  |
| 7  | 0.441362000  | -0.966525000 | 2.182760000  |
| 7  | -0.654782000 | 0.582934000  | -1.634053000 |
| 6  | -2.527626000 | -0.020926000 | 1.284329000  |
| 1  | -3.576754000 | -0.205259000 | 1.040403000  |
| 1  | -2.377469000 | -0.298890000 | 2.333889000  |
| 6  | -2.188805000 | 1.444404000  | 1.170336000  |
| 6  | -3.176055000 | 2.423295000  | 1.274998000  |
| 1  | -4.217043000 | 2.122568000  | 1.309341000  |

|   |              |              |              |
|---|--------------|--------------|--------------|
| 6 | -2.789761000 | 3.760942000  | 1.292231000  |
| 1 | -3.538495000 | 4.542248000  | 1.368420000  |
| 6 | -1.435905000 | 4.083574000  | 1.197309000  |
| 1 | -1.097465000 | 5.113021000  | 1.209153000  |
| 6 | -0.514715000 | 3.052518000  | 1.059021000  |
| 1 | 0.547860000  | 3.236336000  | 0.943139000  |
| 6 | -1.406318000 | -2.178784000 | 1.185986000  |
| 1 | -2.347035000 | -2.630609000 | 1.522061000  |
| 1 | -0.928999000 | -2.873198000 | 0.486300000  |
| 6 | -0.463327000 | -1.951130000 | 2.347793000  |
| 6 | -0.490211000 | -2.735094000 | 3.499644000  |
| 1 | -1.241486000 | -3.509496000 | 3.608742000  |
| 6 | 0.455365000  | -2.503711000 | 4.495724000  |
| 1 | 0.454303000  | -3.101423000 | 5.400835000  |
| 6 | 1.397003000  | -1.492257000 | 4.315007000  |
| 1 | 2.149695000  | -1.279948000 | 5.064856000  |
| 6 | 1.353473000  | -0.745217000 | 3.143414000  |
| 1 | 2.060723000  | 0.053337000  | 2.947062000  |
| 6 | -2.188016000 | -1.140887000 | -0.897191000 |
| 1 | -3.261468000 | -1.342455000 | -0.868936000 |
| 1 | -1.687461000 | -2.031674000 | -1.293464000 |
| 6 | -1.861387000 | 0.009006000  | -1.817700000 |
| 6 | -2.725866000 | 0.406603000  | -2.836162000 |
| 1 | -3.709312000 | -0.048228000 | -2.903674000 |
| 6 | -2.305192000 | 1.406799000  | -3.709107000 |
| 1 | -2.958740000 | 1.740731000  | -4.507893000 |
| 6 | -1.044292000 | 1.978361000  | -3.539308000 |
| 1 | -0.680963000 | 2.754800000  | -4.202342000 |
| 6 | -0.253880000 | 1.545734000  | -2.481520000 |
| 1 | 0.726531000  | 1.968525000  | -2.289257000 |
| 6 | 3.043993000  | 0.567552000  | -0.178052000 |
| 6 | 4.335628000  | 1.147456000  | -0.236655000 |
| 6 | 5.340273000  | 0.331466000  | -0.752802000 |
| 6 | 5.109716000  | -0.985740000 | -1.192474000 |
| 6 | 3.855991000  | -1.586378000 | -1.149684000 |
| 6 | 2.805995000  | -0.781588000 | -0.630227000 |
| 1 | 5.957523000  | -1.540088000 | -1.577747000 |
| 1 | 6.351932000  | 0.712954000  | -0.827099000 |
| 6 | 3.600783000  | -3.021230000 | -1.625198000 |
| 6 | 2.567347000  | -3.017984000 | -2.775733000 |
| 1 | 2.943624000  | -2.442769000 | -3.627920000 |
| 1 | 1.622167000  | -2.579555000 | -2.451477000 |
| 1 | 2.382357000  | -4.044287000 | -3.113246000 |
| 6 | 3.065671000  | -3.873652000 | -0.450273000 |
| 1 | 2.133372000  | -3.460346000 | -0.061632000 |
| 1 | 3.797897000  | -3.908995000 | 0.363254000  |
| 1 | 2.881556000  | -4.900094000 | -0.787828000 |
| 6 | 4.886385000  | -3.688637000 | -2.143956000 |
| 1 | 4.654074000  | -4.706172000 | -2.473966000 |



|    |              |              |              |
|----|--------------|--------------|--------------|
| 1  | 5.652261000  | -3.756969000 | -1.364491000 |
| 1  | 5.308159000  | -3.149046000 | -2.998053000 |
| 6  | 4.595802000  | 2.583716000  | 0.237191000  |
| 6  | 6.073875000  | 2.981729000  | 0.079223000  |
| 1  | 6.395792000  | 2.940794000  | -0.966240000 |
| 1  | 6.733876000  | 2.338644000  | 0.670263000  |
| 1  | 6.208402000  | 4.010231000  | 0.429747000  |
| 6  | 4.224869000  | 2.720326000  | 1.732034000  |
| 1  | 4.835703000  | 2.045896000  | 2.341420000  |
| 1  | 3.171945000  | 2.482160000  | 1.893525000  |
| 1  | 4.409327000  | 3.745909000  | 2.072212000  |
| 6  | 3.748591000  | 3.571506000  | -0.597826000 |
| 1  | 3.922711000  | 4.598391000  | -0.256122000 |
| 1  | 2.684791000  | 3.346440000  | -0.502668000 |
| 1  | 4.023863000  | 3.513923000  | -1.655942000 |
| 17 | -5.910440000 | -0.649054000 | -0.482785000 |
| 8  | -5.411863000 | 0.734933000  | -0.148032000 |
| 8  | -5.203956000 | -1.625560000 | 0.428087000  |
| 8  | -7.372583000 | -0.734337000 | -0.299669000 |
| 8  | -5.528215000 | -0.963888000 | -1.900218000 |

**Complex 4.**  $\Delta E_{\text{hs-ls}} = 9.6$  kcal/mol

LS-state ( $E_{\text{total}} = -3300.688381$  a.u.)

|    |              |              |              |
|----|--------------|--------------|--------------|
| 26 | -0.045206000 | -0.344708000 | 0.239975000  |
| 8  | -1.700039000 | -1.151026000 | -0.183959000 |
| 8  | -0.998390000 | 1.290996000  | 0.045920000  |
| 7  | 1.680957000  | 0.530427000  | 0.718301000  |
| 7  | 0.941087000  | -2.031621000 | 0.376117000  |
| 7  | -0.327962000 | -0.264729000 | 2.188110000  |
| 7  | 0.645133000  | -0.214917000 | -1.605096000 |
| 6  | 2.705747000  | -0.518040000 | 1.065014000  |
| 1  | 3.675105000  | -0.269694000 | 0.625951000  |
| 1  | 2.836996000  | -0.514080000 | 2.152064000  |
| 6  | 2.255995000  | -1.891203000 | 0.651204000  |
| 6  | 3.135979000  | -2.970959000 | 0.588907000  |
| 1  | 4.192149000  | -2.806694000 | 0.769050000  |
| 6  | 2.635291000  | -4.229954000 | 0.274031000  |
| 1  | 3.300777000  | -5.084398000 | 0.216947000  |
| 6  | 1.269905000  | -4.374824000 | 0.021052000  |
| 1  | 0.841139000  | -5.338283000 | -0.228007000 |
| 6  | 0.456668000  | -3.251687000 | 0.068293000  |
| 1  | -0.604327000 | -3.285984000 | -0.148383000 |
| 6  | 1.394355000  | 1.386837000  | 1.899841000  |
| 1  | 2.314700000  | 1.714087000  | 2.394205000  |
| 1  | 0.853564000  | 2.265870000  | 1.539413000  |

|   |              |              |              |
|---|--------------|--------------|--------------|
| 6 | 0.482974000  | 0.616782000  | 2.821963000  |
| 6 | 0.422215000  | 0.801829000  | 4.198586000  |
| 1 | 1.095497000  | 1.504135000  | 4.676919000  |
| 6 | -0.511079000 | 0.077065000  | 4.939511000  |
| 1 | -0.578054000 | 0.207978000  | 6.013938000  |
| 6 | -1.350708000 | -0.816630000 | 4.279372000  |
| 1 | -2.092521000 | -1.395945000 | 4.815909000  |
| 6 | -1.227162000 | -0.963544000 | 2.902508000  |
| 1 | -1.852853000 | -1.638259000 | 2.331426000  |
| 6 | 2.088280000  | 1.337050000  | -0.474396000 |
| 1 | 3.139181000  | 1.627449000  | -0.431809000 |
| 1 | 1.464233000  | 2.236046000  | -0.469891000 |
| 6 | 1.753588000  | 0.556546000  | -1.713013000 |
| 6 | 2.478824000  | 0.644625000  | -2.896830000 |
| 1 | 3.395822000  | 1.223304000  | -2.909181000 |
| 6 | 2.014605000  | -0.046807000 | -4.013922000 |
| 1 | 2.560148000  | 0.001864000  | -4.950020000 |
| 6 | 0.850559000  | -0.807227000 | -3.911030000 |
| 1 | 0.454904000  | -1.352504000 | -4.759797000 |
| 6 | 0.199461000  | -0.879497000 | -2.685440000 |
| 1 | -0.697244000 | -1.468564000 | -2.536398000 |
| 6 | -2.676592000 | -0.269438000 | -0.366994000 |
| 6 | -4.016230000 | -0.629758000 | -0.677183000 |
| 6 | -4.898493000 | 0.432299000  | -0.838002000 |
| 6 | -4.506512000 | 1.780680000  | -0.710454000 |
| 6 | -3.206177000 | 2.167840000  | -0.412411000 |
| 6 | -2.275869000 | 1.105172000  | -0.235956000 |
| 6 | -2.785932000 | 3.636785000  | -0.284458000 |
| 6 | -2.241228000 | 3.906095000  | 1.137345000  |
| 1 | -1.382826000 | 3.267873000  | 1.351966000  |
| 1 | -3.014073000 | 3.711708000  | 1.888207000  |
| 1 | -1.932166000 | 4.953633000  | 1.227611000  |
| 6 | -3.967690000 | 4.594313000  | -0.521348000 |
| 1 | -4.768040000 | 4.443543000  | 0.210438000  |
| 1 | -4.388623000 | 4.479847000  | -1.525371000 |
| 1 | -3.616957000 | 5.626738000  | -0.423304000 |
| 6 | -1.695696000 | 3.965159000  | -1.330577000 |
| 1 | -1.385783000 | 5.011760000  | -1.232382000 |
| 1 | -2.080161000 | 3.817432000  | -2.344837000 |
| 1 | -0.820864000 | 3.327195000  | -1.197433000 |
| 6 | -4.450074000 | -2.093900000 | -0.828662000 |
| 6 | -5.947918000 | -2.216236000 | -1.161531000 |
| 1 | -6.195710000 | -1.721446000 | -2.105884000 |
| 1 | -6.575676000 | -1.790382000 | -0.372299000 |
| 1 | -6.208566000 | -3.274910000 | -1.261256000 |
| 6 | -4.197094000 | -2.863610000 | 0.488000000  |
| 1 | -4.757644000 | -2.410846000 | 1.312441000  |
| 1 | -3.135236000 | -2.859622000 | 0.741277000  |
| 1 | -4.525140000 | -3.904227000 | 0.384245000  |

|   |              |              |              |
|---|--------------|--------------|--------------|
| 6 | -3.657262000 | -2.764303000 | -1.974224000 |
| 1 | -3.968690000 | -3.809283000 | -2.085976000 |
| 1 | -2.585376000 | -2.741245000 | -1.768624000 |
| 1 | -3.842606000 | -2.250352000 | -2.922825000 |
| 1 | -5.268724000 | 2.536670000  | -0.857773000 |
| 1 | -5.937187000 | 0.235275000  | -1.075346000 |
| 5 | 5.674950000  | 1.103609000  | -0.387781000 |
| 9 | 5.005831000  | 1.558952000  | 0.795883000  |
| 9 | 5.349362000  | -0.281176000 | -0.544786000 |
| 9 | 5.127678000  | 1.812355000  | -1.493030000 |
| 9 | 7.040240000  | 1.286094000  | -0.289017000 |

HS-state ( $E_{\text{total}} = -3300.673143$  a.u.)

|    |              |              |              |
|----|--------------|--------------|--------------|
| 26 | 0.158681000  | 0.092841000  | 0.193937000  |
| 8  | 1.756214000  | 1.215928000  | 0.380375000  |
| 8  | 1.475658000  | -1.134054000 | -0.589714000 |
| 7  | -1.771276000 | -1.020274000 | 0.222449000  |
| 7  | -1.173060000 | 1.635362000  | 0.971704000  |
| 7  | 0.209772000  | -1.107333000 | 2.039942000  |
| 7  | -0.722584000 | 0.610746000  | -1.739595000 |
| 6  | -2.722994000 | -0.235253000 | 1.070616000  |
| 1  | -3.756108000 | -0.461439000 | 0.805088000  |
| 1  | -2.571604000 | -0.560060000 | 2.106227000  |
| 6  | -2.464084000 | 1.249935000  | 1.038033000  |
| 6  | -3.506222000 | 2.168978000  | 1.156016000  |
| 1  | -4.529589000 | 1.807377000  | 1.164410000  |
| 6  | -3.190037000 | 3.522812000  | 1.241557000  |
| 1  | -3.980297000 | 4.260639000  | 1.331270000  |
| 6  | -1.852855000 | 3.918843000  | 1.201316000  |
| 1  | -1.569893000 | 4.962884000  | 1.268052000  |
| 6  | -0.874087000 | 2.944171000  | 1.051977000  |
| 1  | 0.180654000  | 3.188219000  | 0.985309000  |
| 6  | -1.513294000 | -2.333364000 | 0.856845000  |
| 1  | -2.446001000 | -2.851929000 | 1.109253000  |
| 1  | -0.965888000 | -2.948671000 | 0.134909000  |
| 6  | -0.643312000 | -2.149087000 | 2.082157000  |
| 6  | -0.682688000 | -3.018664000 | 3.170411000  |
| 1  | -1.392736000 | -3.838223000 | 3.181495000  |
| 6  | 0.195633000  | -2.811363000 | 4.231505000  |
| 1  | 0.183286000  | -3.475221000 | 5.089192000  |
| 6  | 1.083328000  | -1.738226000 | 4.178089000  |
| 1  | 1.781679000  | -1.541892000 | 4.982823000  |
| 6  | 1.055770000  | -0.907973000 | 3.063680000  |
| 1  | 1.722181000  | -0.057858000 | 2.966063000  |
| 6  | -2.272419000 | -1.172409000 | -1.172698000 |
| 1  | -3.351458000 | -1.345594000 | -1.186667000 |
| 1  | -1.771751000 | -2.048198000 | -1.600751000 |
| 6  | -1.901229000 | 0.020365000  | -2.020478000 |

|   |              |              |              |
|---|--------------|--------------|--------------|
| 6 | -2.702356000 | 0.443154000  | -3.080292000 |
| 1 | -3.671800000 | -0.015984000 | -3.229660000 |
| 6 | -2.248491000 | 1.481095000  | -3.888517000 |
| 1 | -2.855628000 | 1.832934000  | -4.715698000 |
| 6 | -1.014323000 | 2.070732000  | -3.614430000 |
| 1 | -0.625443000 | 2.879137000  | -4.222349000 |
| 6 | -0.287535000 | 1.613149000  | -2.522818000 |
| 1 | 0.668223000  | 2.047268000  | -2.248902000 |
| 6 | 2.879658000  | 0.641140000  | -0.038572000 |
| 6 | 4.154423000  | 1.254970000  | 0.036574000  |
| 6 | 5.217765000  | 0.500408000  | -0.455121000 |
| 6 | 5.058472000  | -0.789269000 | -0.996650000 |
| 6 | 3.823394000  | -1.422230000 | -1.085111000 |
| 6 | 2.715840000  | -0.682917000 | -0.588419000 |
| 1 | 5.947350000  | -1.295001000 | -1.355287000 |
| 1 | 6.220421000  | 0.911051000  | -0.428338000 |
| 6 | 3.644179000  | -2.823720000 | -1.679782000 |
| 6 | 2.695444000  | -2.756279000 | -2.899564000 |
| 1 | 3.117425000  | -2.113022000 | -3.678609000 |
| 1 | 1.719401000  | -2.360692000 | -2.613772000 |
| 1 | 2.559764000  | -3.758608000 | -3.321986000 |
| 6 | 3.049684000  | -3.774281000 | -0.614186000 |
| 1 | 2.078951000  | -3.413811000 | -0.269937000 |
| 1 | 3.719777000  | -3.851574000 | 0.248455000  |
| 1 | 2.923274000  | -4.777062000 | -1.038357000 |
| 6 | 4.981470000  | -3.421040000 | -2.151777000 |
| 1 | 4.802054000  | -4.417503000 | -2.568116000 |
| 1 | 5.693503000  | -3.526834000 | -1.326793000 |
| 1 | 5.445165000  | -2.811735000 | -2.934268000 |
| 6 | 4.336320000  | 2.662080000  | 0.619679000  |
| 6 | 5.810602000  | 3.103951000  | 0.606619000  |
| 1 | 6.216280000  | 3.139463000  | -0.409547000 |
| 1 | 6.439351000  | 2.439037000  | 1.207616000  |
| 1 | 5.888149000  | 4.110111000  | 1.031112000  |
| 6 | 3.848613000  | 2.693195000  | 2.086981000  |
| 1 | 4.425712000  | 1.990204000  | 2.697100000  |
| 1 | 2.791636000  | 2.428659000  | 2.152677000  |
| 1 | 3.984386000  | 3.696805000  | 2.506052000  |
| 6 | 3.528677000  | 3.682671000  | -0.215177000 |
| 1 | 3.645220000  | 4.688352000  | 0.205150000  |
| 1 | 2.467616000  | 3.426160000  | -0.220864000 |
| 1 | 3.888252000  | 3.702212000  | -1.249140000 |
| 5 | -5.942198000 | -0.676536000 | -0.358095000 |
| 9 | -5.954267000 | 0.072842000  | 0.851311000  |
| 9 | -7.221108000 | -0.939499000 | -0.808892000 |
| 9 | -5.196779000 | 0.069687000  | -1.324962000 |
| 9 | -5.217982000 | -1.888443000 | -0.117751000 |
